# Supplementary material for: SMARCA4 regulates the NK-mediated killing of senescent cells
Source: PubMed Central journal article supplement (PMC11734740; doi:10.1126/sciadv.adn2811), 2025-01-15
Supplement: sciadv.adn2811_sm.pdf [file sciadv.adn2811_sm.pdf]

Supplementary Materials for  
**SMARCA4 regulates the NK-mediated killing of senescent cells**

Virinder Reen *et al.*

Corresponding author: Jesús Gil, [jesus.gil@imperial.ac.uk](mailto:jesus.gil@imperial.ac.uk)

*Sci. Adv.* **11**, eadn2811 (2025)  
DOI: 10.1126/sciadv.adn2811

**The PDF file includes:**

Figs. S1 to S16  
Legends for tables S1 to S3 and S11  
Tables S4 to S10

**Other Supplementary Material for this manuscript includes the following:**

Tables S1 to S3 and S11

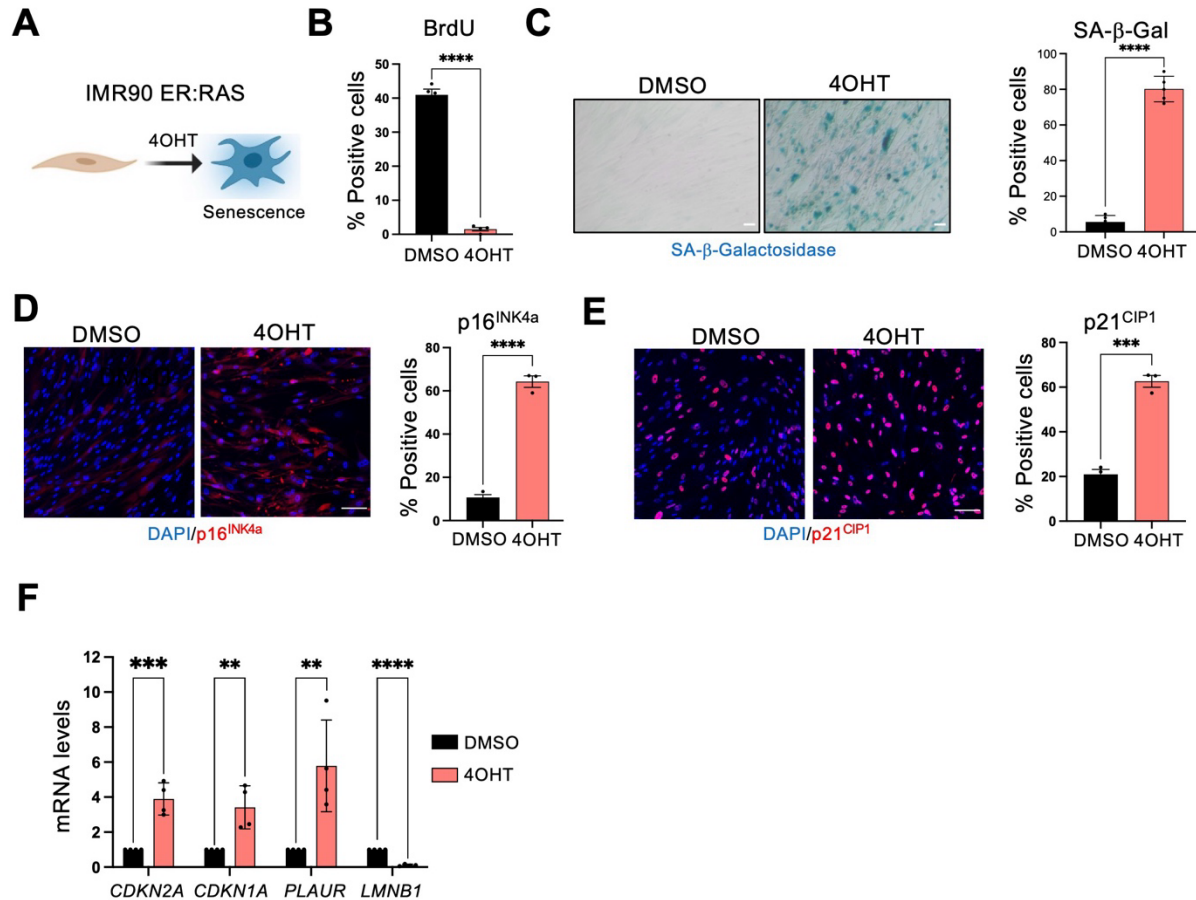

**Figure S1. IMR90 ER:RAS as a model to study oncogene-induced senescence (OIS).** (A) IMR90 ER:RAS cells as a model of oncogene-induced senescence (OIS). IMR90 fibroblasts infected with the ER:RAS construct undergo OIS upon the addition of 4OHT. (B) Quantification of immunofluorescence (IF) staining for BrdU incorporation in IMR90 ER:RAS cells 8 days after treatment with DMSO or 4OHT. Data represents mean  $\pm$  SEM (n = 3). \*\*\*\*p < 0.0001; unpaired t-test. (C) Quantification of SA- $\beta$ -galactosidase (SA- $\beta$ -gal) activity in IMR90 ER:RAS cells. Left panel, representative brightfield images for SA- $\beta$ -gal staining in IMR90 ER:RAS cells 7 days following treatment with DMSO or 4OHT. Scale bar, 100 $\mu$ m. Right panel, quantification of the percentage of cells staining positive for SA- $\beta$ -gal. Data represents mean  $\pm$  SEM (n = 5). \*\*\*\*p < 0.0001; unpaired t-test. (D-E) IF staining for senescence markers. Left panel, representative IF images for p16<sup>INK4a</sup> staining (D) and p21<sup>CIP1</sup> (E) in IMR90 ER:RAS cells 8 days following treatment with DMSO or 4OHT. Scale bar, 100  $\mu$ m. Right panel, quantification of the percentage of cells staining positive for p16<sup>INK4a</sup> (D) and p21<sup>CIP1</sup> (E). Data represents mean  $\pm$  SEM (n =

3). \*\*\* $p < 0.001$ ; \*\*\*\* $p < 0.0001$ ; unpaired t-test. **(F)** qRT-PCR analysis of indicated senescence markers in IMR90 ER:RAS cells 8 days following treatment with DMSO or 4OHT (n = 3). \*\* $p < 0.01$ ; \*\*\*\* $p < 0.0001$ ; unpaired t-test.

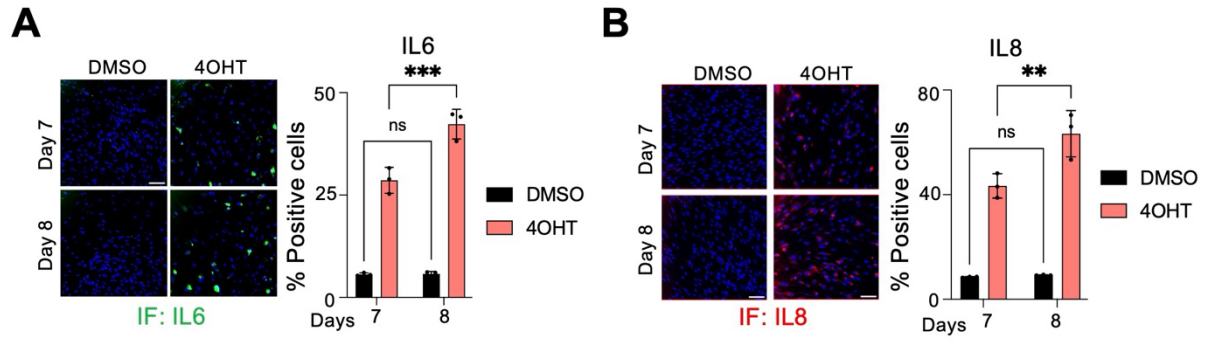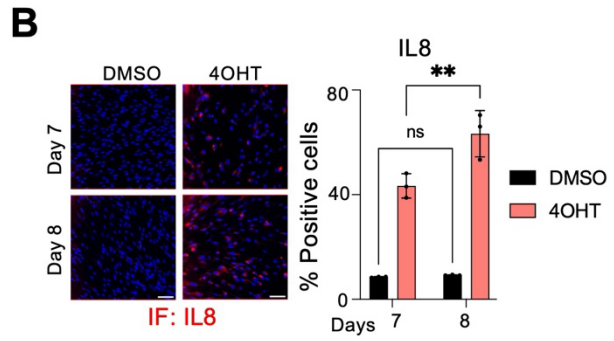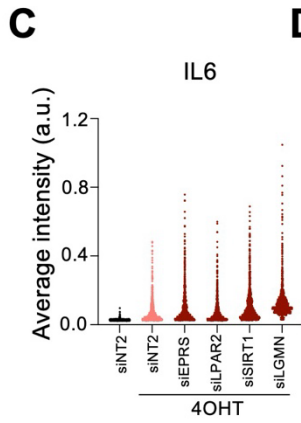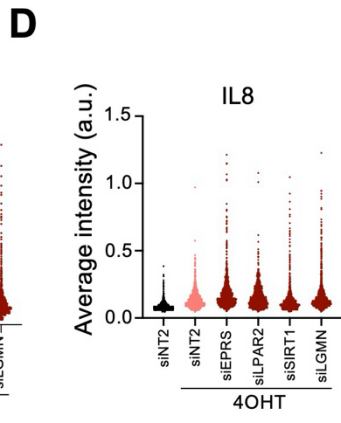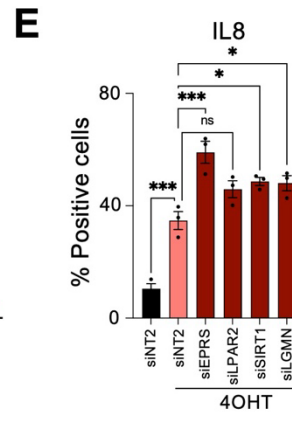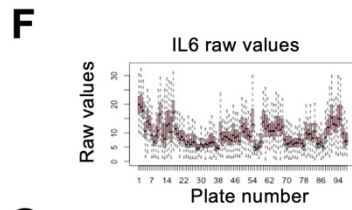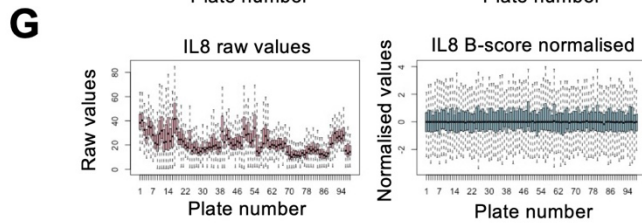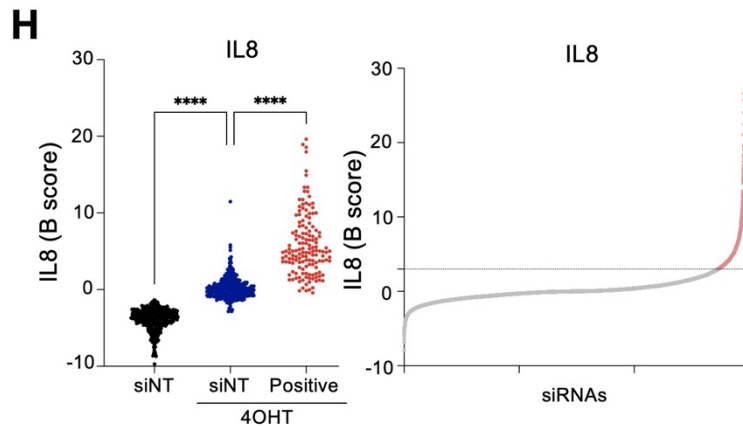

**Figure S2. Screens to identify siRNAs superinducing the SASP in IMR90 ER:RAS cells.** **(A-B)** Representative immunofluorescence (IF) images (left panel) and quantification (right panel) of the percentage of IL6 **(A)** and IL8 **(B)** positive IMR90 ER:RAS cells at days 7 and 8 following senescence induction. Scale bar, 100  $\mu$ m. Data represents mean  $\pm$  SD (n = 3). \*\*p < 0.01; \*\*\*p < 0.001; ns, not significant; ordinary one-way ANOVA (Tukey's multiple comparisons test). **(C-D)** Quantification of IF displaying the average intensity values of IL6 **(C)** and IL8 **(D)** per cell in a representative sample well seeded with IMR90 ER:RAS cells transfected with the specified control siRNAs. **(E)** IF quantification in the percentage of IMR90 ER:RAS cells positive for IL8 expression beyond a pre-determined threshold following transfection with the indicated siRNAs. Data represents mean  $\pm$  SD (n = 3). \*p < 0.05; \*\*\*p < 0.001; ns, not significant; ordinary one-way ANOVA (Dunnett's multiple comparisons test). **(F-G)** B-score normalisation for IL6 **(F)** and IL8 **(G)** from the siRNA SASP superinducer screen. The distribution of the normalisation within each screen plate is displayed as an individual box-and-whisker plot. The left panel shows the raw B-score value of IL6 or IL8 for plates with siRNA-transfected IMR90 ER: RAS cells. The right panel shows the normalised B-score values for each screened plate. Displayed are the representative pre- and post-normalisation distributions for one of the two biological replicates of the siRNA screen. **(H)** Results of the siRNA screen for IL8 superinducers. The left panel represents the normalised score for the control siRNAs. The right panel displays the normalised score for each sample siRNA pool. The dotted line indicates the threshold beyond which hits were selected. \*\*\*\*p < 0.0001; ordinary one-way ANOVA (Tukey's multiple comparisons test).

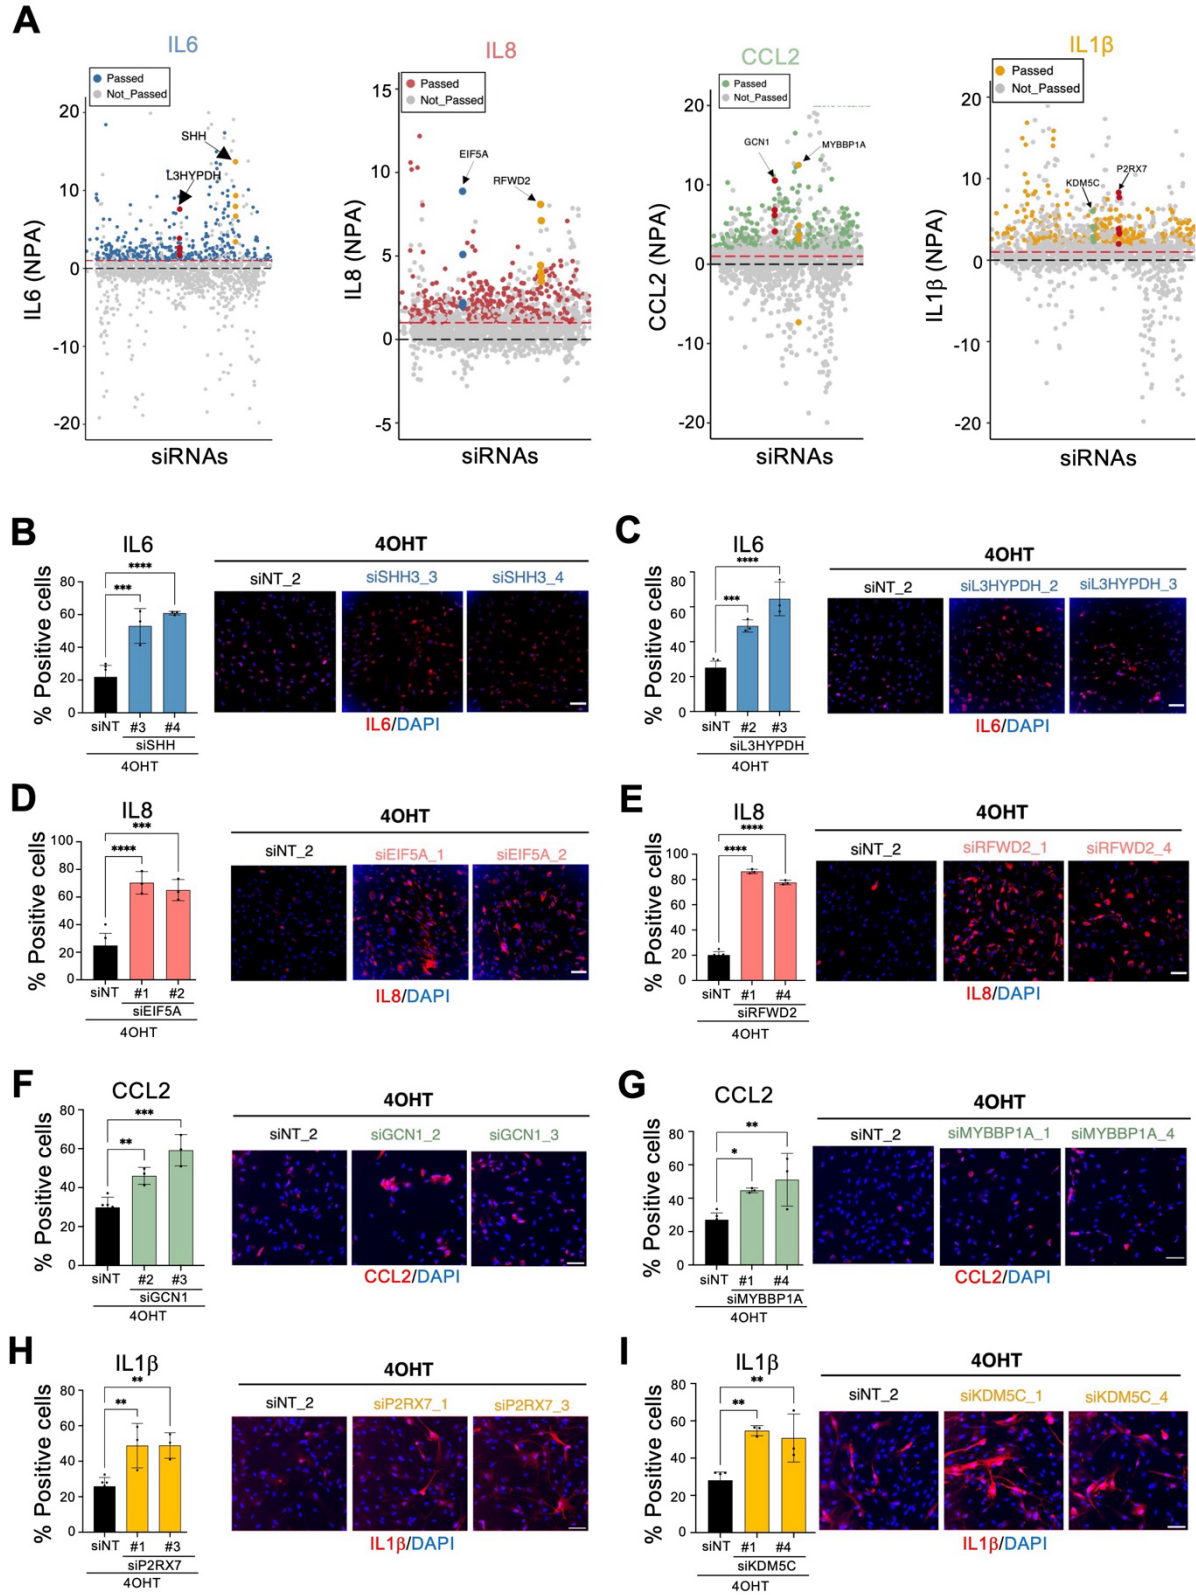

**Figure S3. Representative hits identified in the screen for SASP regulators. (A)** Results of the secondary siRNA screen for superinducers of the indicated SASP

readouts. Normalised NPA scores of the SASP readouts are shown for each replicate siRNA sample. The black dotted line represents the normalised score of the negative non-targeting siRNA controls (NPA = 0). The red dotted line represents the normalised score of positive siRNA controls (NPA = 1). For IL6 and IL8, the threshold for hit selection was  $NPA \geq 1$ . For CCL2 and IL1 $\beta$ , the threshold was set at  $NPA \geq 2$ . Hits were selected if at least 2 of 4 siRNA targeting a gene scored beyond the specified threshold in at least 2/3 replicates. Two examples of genes whose knockdown results in elevated expression of each SASP readout are shown **(B-I)**. Quantification and representative IF images for IL6 **(B-C)**, IL8 **(D-E)**, CCL2 **(F-G)** and IL1 $\beta$  **(H-I)** in senescent IMR90 ER:RAS cells transfected with the indicated siRNAs. Scale bar, 100  $\mu$ m. Data represents mean  $\pm$  SEM (n = 3). \*p < 0.05; \*\*p < 0.01; \*\*\*p < 0.001; \*\*\*\*p < 0.0001; ordinary one-way ANOVA (Tukey's multiple comparisons test).

**A**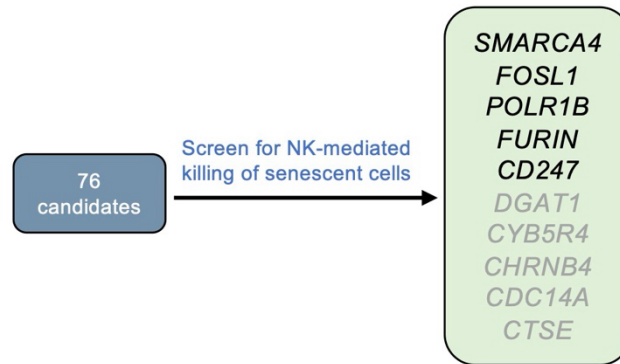**B**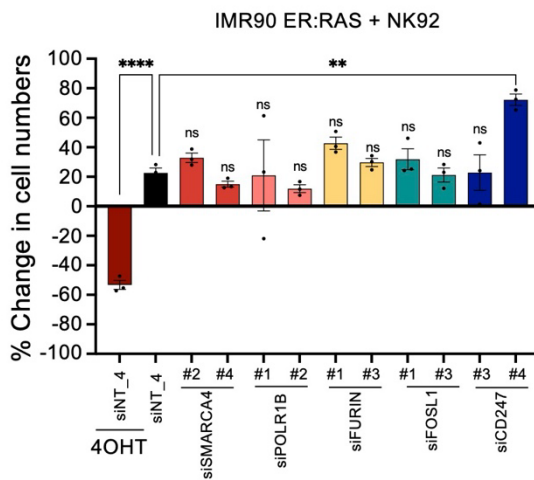**C**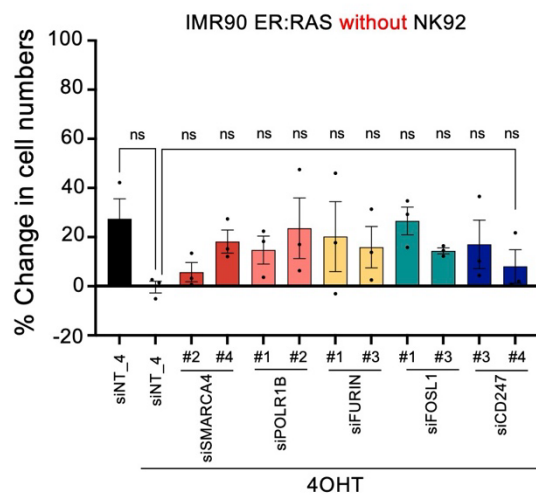**D**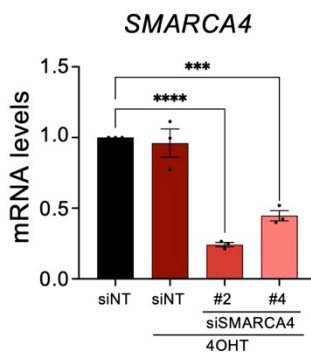**E**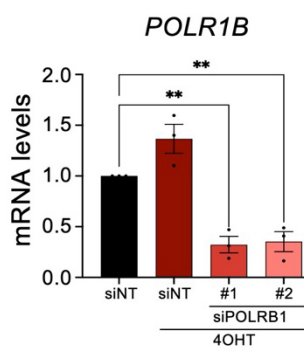**F**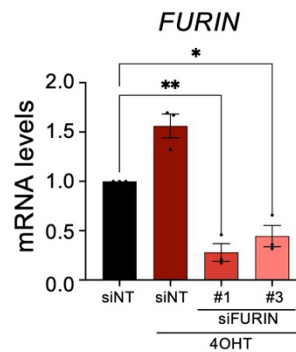

**Figure S4. Regulators of NK-mediated killing of senescent cells. (A)** List of ten gene candidates selected as hits from the siRNA screen to identify reinforcers of NK-mediated killing of senescent cells. The five genes retested are shown in black. **(B)** Percentage



change in IMR90 ER:RAS cells transfected with the indicated siRNA and treated with DMSO after co-culture with NK cells at a 2:1 E:T ratio. Data represents mean  $\pm$  SEM (n = 3). \*\*p < 0.01; \*\*\*\*p < 0.0001; ns, not significant; ordinary one-way ANOVA (Dunnett's multiple comparisons test). **(C)** Percentage change in IMR90 ER:RAS cells transfected with the indicated siRNA and treated with 4OHT in the absence of NK cells. Data represents mean  $\pm$  SEM (n = 3). ns, not significant; ordinary one-way ANOVA (Dunnett's multiple comparisons test). **(D-F)** qRT-PCR analysis showing the mRNA expression of SMARCA4 **(D)** POLR1B **(E)** and FURIN **(F)** in IMR90 ER:RAS cells 3 days after being transfected with two selected siRNAs against the indicated genes. Data represents mean  $\pm$  SEM (n = 3). \*p < 0.05; \*\*p < 0.01; \*\*\*p < 0.001; \*\*\*\*p < 0.0001; ordinary one-way ANOVA (Tukey's multiple comparisons test).

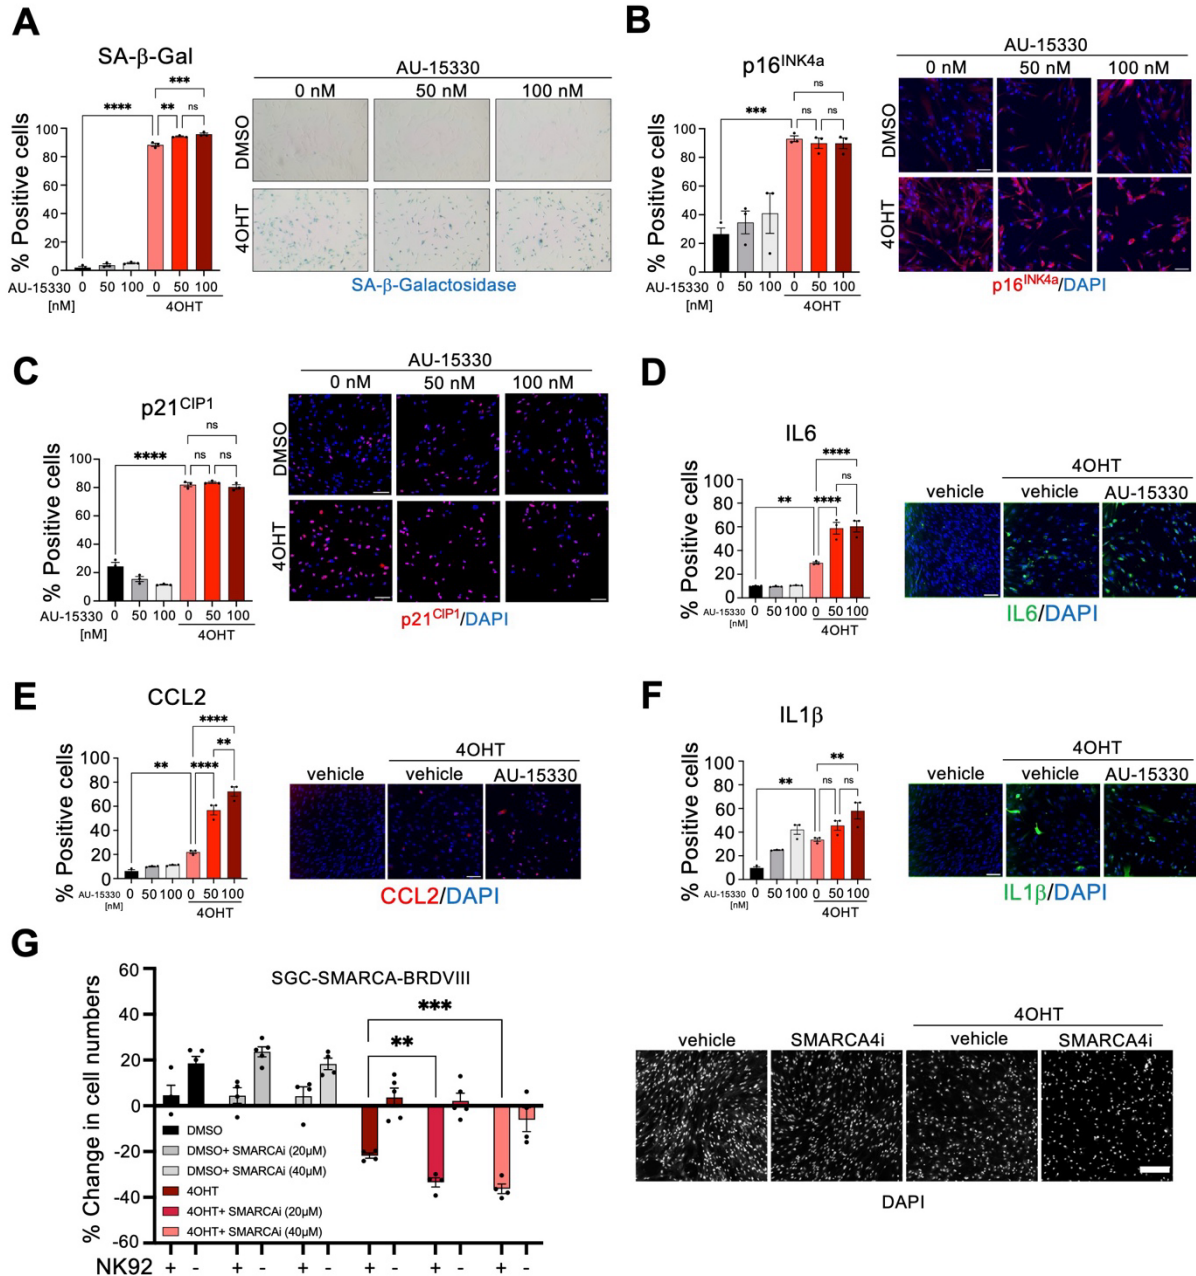

**Figure S5. Effects of SMARCA4 inhibitors in a model of oncogene-induced senescence (OIS).** (A) Quantification (left panel) and representative images right panel) of SA- $\beta$ -gal activity in DMSO or 4OHT-induced IMR90 ER:RAS cells treated with AU-153330 at the indicated concentrations. Scale bar, 100  $\mu$ m. Data represents mean  $\pm$  SEM (n = 3). \*\*p < 0.01; \*\*\*p < 0.001; \*\*\*\*p < 0.0001; ns, not significant; ordinary one-way ANOVA (Tukey's multiple comparisons test). (B-F) IF staining for senescence markers. Left panel, quantification of the percentage of cells staining positive for p16<sup>INK4a</sup> (B),

p21<sup>CIP1</sup> (C), IL6 (D), CCL2 (E) and IL1 $\beta$  (F) in IMR90 ER:RAS cells at day 7 after DMSO or 4OHT induction, and treated with the indicated concentrations of AU-15330 at day 4. Right panel, representative IF images. Scale bar, 100  $\mu$ m. Data represents mean  $\pm$  SEM (n = 3). \*\*p < 0.01; \*\*\*\*p < 0.0001; ns, not significant; ordinary one-way ANOVA (Tukey's multiple comparisons test). **(G)** Quantification (left panel) and representative images (right panel) of NK-mediated killing of DMSO or 4OHT-induced IMR90 ER:RAS cells treated with the SMARCA4 inhibitor, SGC-SMARCA-BRDVIII at the indicated concentrations. NK cells were added at a 1:1 E:T ratio for 48 hours. Scale bar, 300  $\mu$ m. Data represents mean  $\pm$  SEM (n = 4). \*\*p < 0.01; \*\*\*p < 0.001; ordinary one-way ANOVA (Tukey's multiple comparisons test).

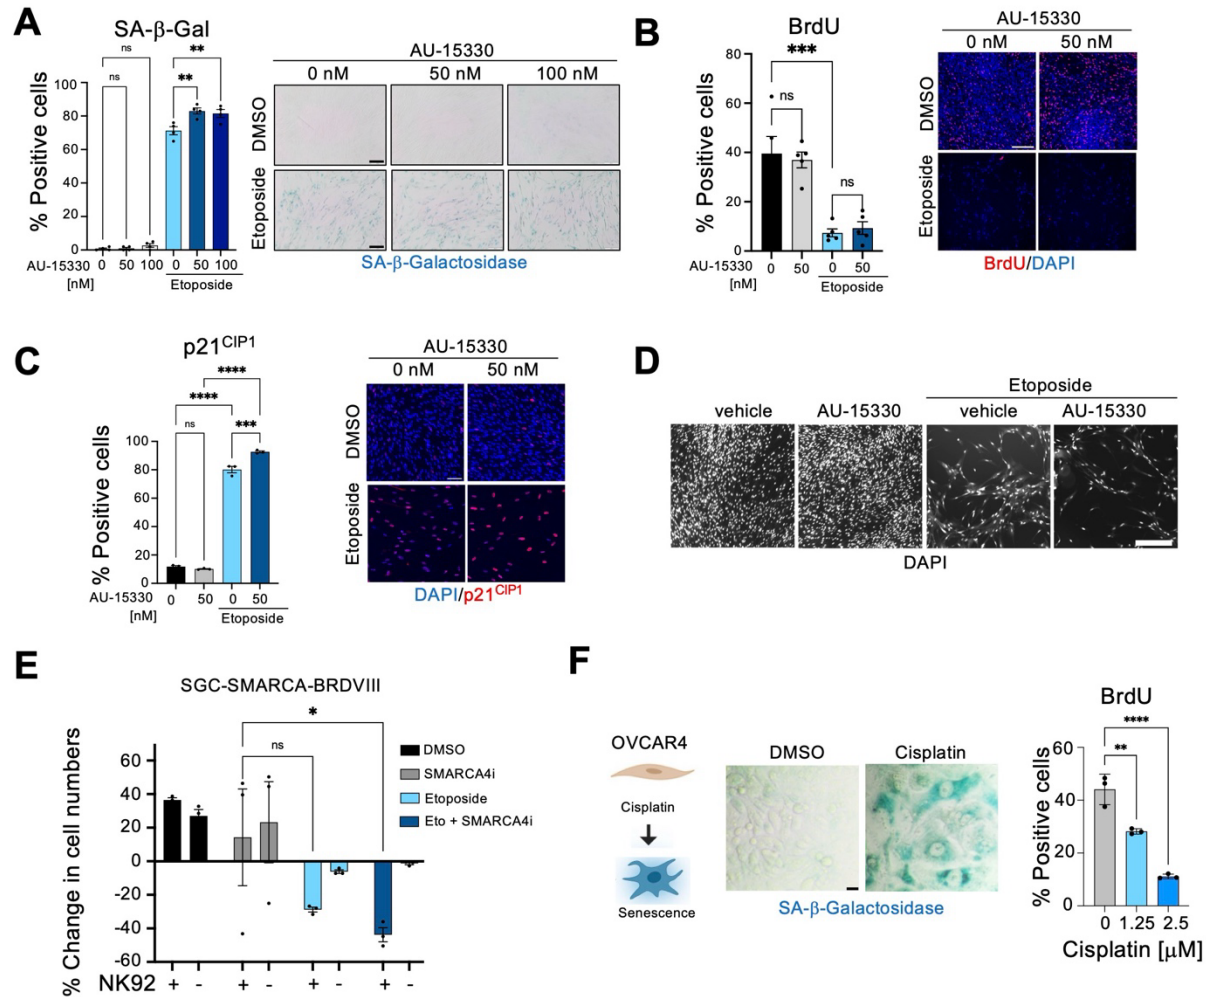

**Figure S6. Effects of SMARCA4 inhibitors in therapy-induced senescence (TIS).** (A) Quantification (left panel) and representative images (right panel) of SA-β-gal activity in DMSO or etoposide-induced IMR90 cells. Control or senescent IMR90 cells were treated with AU-15330 at day 4 at the indicated concentrations. Scale bar, 100 μm. Data represents mean ± SEM (n = 3). \*\*p < 0.01; ns, not significant; ordinary one-way ANOVA (Tukey's multiple comparisons test). (B-C) IF staining for senescence markers. Left panel, quantification of the percentage of cells staining positive for BrdU (B) and p21<sup>CIP1</sup> (C) at day 7 in DMSO or etoposide-induced IMR90 cells which were treated with the 50 nM of AU-15330 at day 4. Right panel, representative IF images for BrdU staining (B) and p21<sup>CIP1</sup> (C). Scale bar, 100 μm. Data represents mean ± SEM (n = 3). \*\*\*p < 0.001; \*\*\*\*p < 0.0001; ns, not significant; ordinary one-way ANOVA (Tukey's multiple comparisons test). (D) Representative images of DMSO or etoposide-induced IMR90 cells treated in

the presence or absence of 50 nM AU-15330, after 48 hours of co-culture with NK cells. Scale bar, 300  $\mu\text{m}$ . **(E)** Quantification of NK-mediated killing of DMSO or etoposide-induced senescent IMR90 cells and treatment with the SMARCA4 inhibitor, SGC-SMARCA-BRDVIII, at the indicated concentrations. NK cells were added at a 2:1 E:T ratio for 48 hours. Data represents mean  $\pm$  SEM (n = 3). \*p < 0.05; ns, not significant; two-way ANOVA (Tukey's multiple comparisons test). **(F)** SA- $\beta$ -gal activity in cisplatin-induced OVCAR4 cells. Middle panel, representative SA- $\beta$ -gal IF images of OVCAR4 cells treated with Cisplatin for 6 days to induce senescence. Scale bar, 20  $\mu\text{m}$ . Right panel, quantification of the percentage of cisplatin-treated OVCAR4 cells positive for BrdU. Data represents mean  $\pm$  SD (n = 3). \*\*p < 0.01; \*\*\*\*p < 0.0001; ordinary one-way ANOVA (Dunnett's multiple comparisons test).

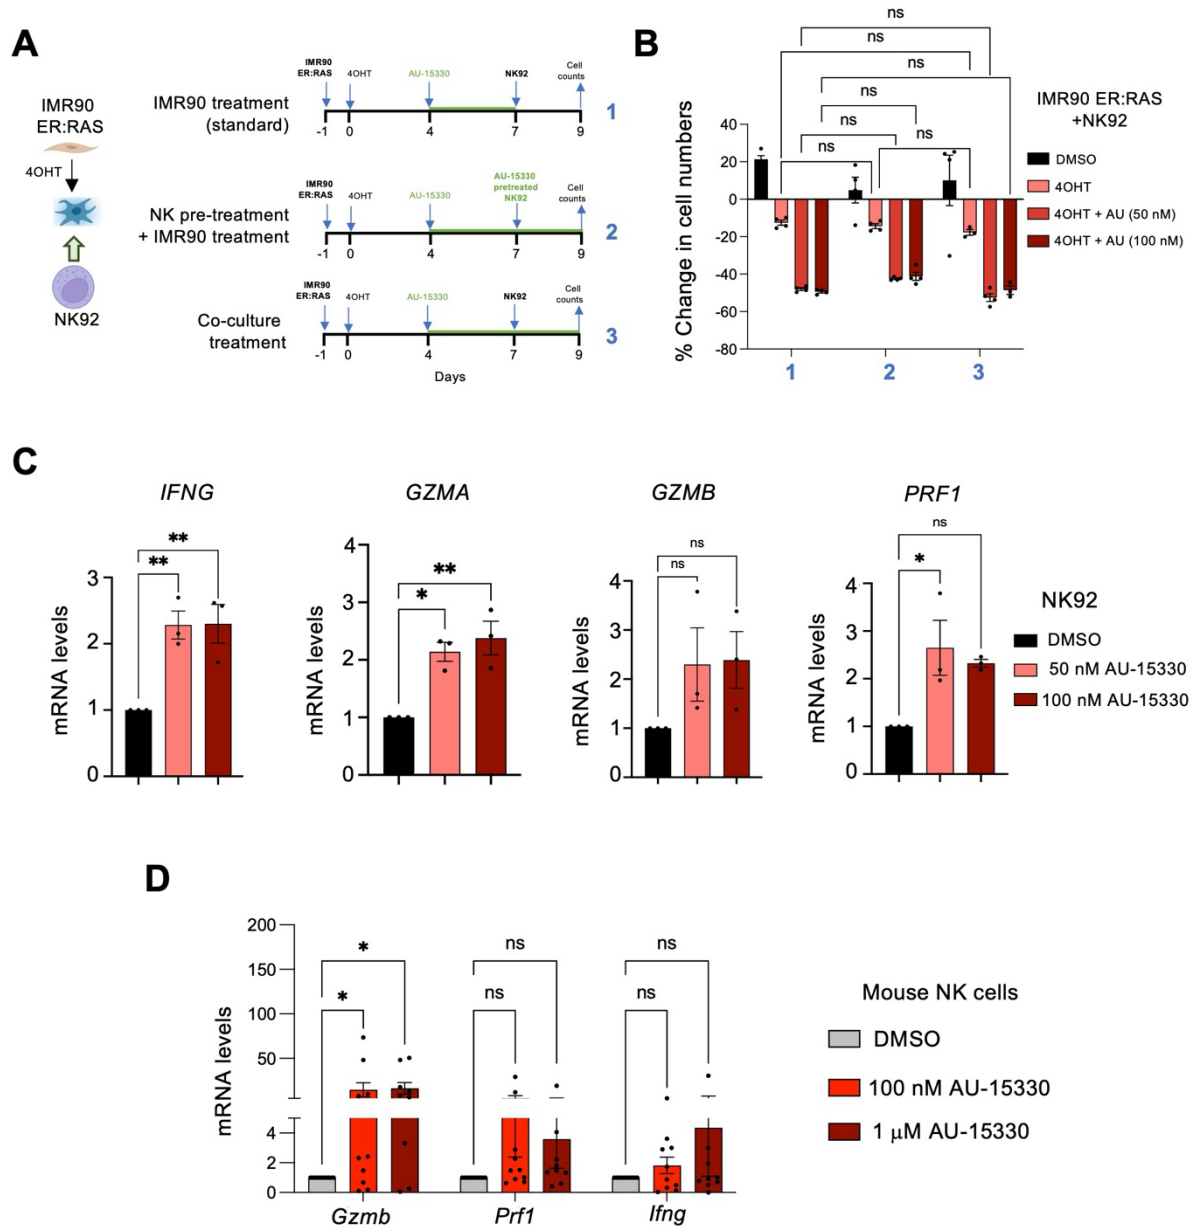

**Figure S7. Effect of the SMARCA4 inhibitor AU-15330 in NK cells. (A)** Schematic of the experimental settings of the NK cell co-culture with IMR90 ER:RAS cells. Co-cultures were performed with NK92 cells pre-treated with or without AU-15330 as indicated. **(B)** Quantification of the percentage change in IMR90 ER:RAS cell counts following co-culture with NK cells pre-treated with AU-15330 or not, as shown in **(A)**. Data represents mean  $\pm$  SEM ( $n = 4$ ). ns, not significant; two-way ANOVA (Tukey's multiple comparisons test). **(C)** mRNA expression levels of *IFNG*, *GZMA*, *GZMB* and *PRF1* in NK92-MI measured by qRT-PCR. Data represents mean  $\pm$  SEM. \* $p < 0.05$ ; \*\* $p < 0.01$ ; ns, not significant; one-way ANOVA (Dunnett's multiple comparisons test). **(D)** mRNA expression

levels of *Gzmb*, *Prf1* and *Ifng* in NK cells purified from mouse spleen measured by qRT-PCR. Data represents mean  $\pm$  SD. \* $p < 0.05$ ; ns, not significant; two-way ANOVA (Tukey's multiple comparisons test).

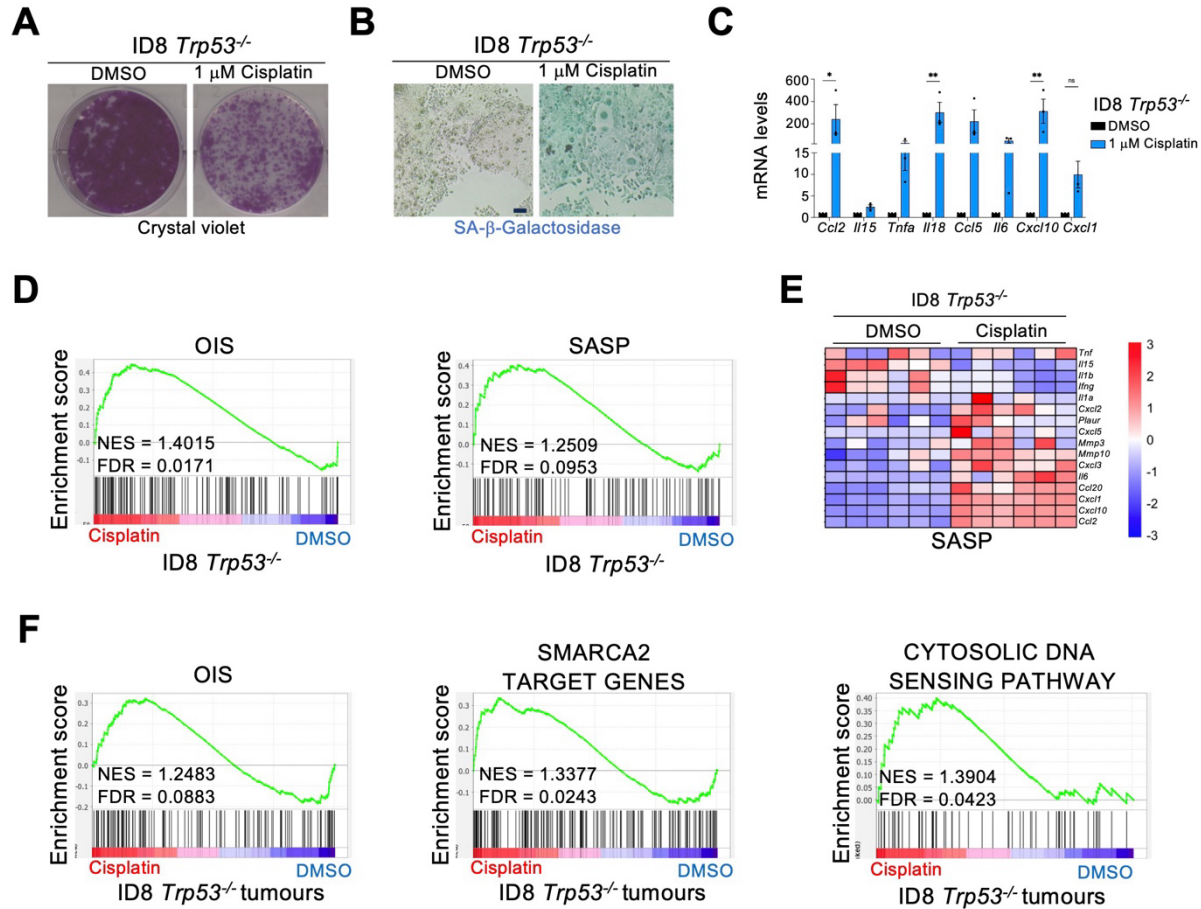

**Figure S8. Cisplatin-induced senescence in ID8 *Trp53*<sup>-/-</sup> cells and tumours.** (A) Representative crystal violet images of ID8 *Trp53*<sup>-/-</sup> cells DMSO or cisplatin-treated. (B) Representative SA-β-gal pictures of ID8 *Trp53*<sup>-/-</sup> cells DMSO or cisplatin-treated. Scale bar: 50 μm. (C) mRNA expression levels of SASP markers in ID8 *Trp53*<sup>-/-</sup> cells DMSO or cisplatin-treated measured by qRT-PCR. Data represents mean ± SEM (n = 3). \*p<0.05; \*\*p<0.01; ns, not significant; two-way ANOVA (Šídák's multiple comparisons test). (D) GSEA enrichment plots of OIS and SASP signature in DMSO or cisplatin-treated ID8 *Trp53*<sup>-/-</sup> cells. (E) Heatmap of RNA-Seq data showing SASP expression levels in DMSO or cisplatin-treated ID8 *Trp53*<sup>-/-</sup> cells. (F) GSEA plots of OIS, SMARCA2 target gene, and Cytosolic DNA sensing pathway signature in DMSO or cisplatin-treated ID8 *Trp53*<sup>-/-</sup> omental tumours.



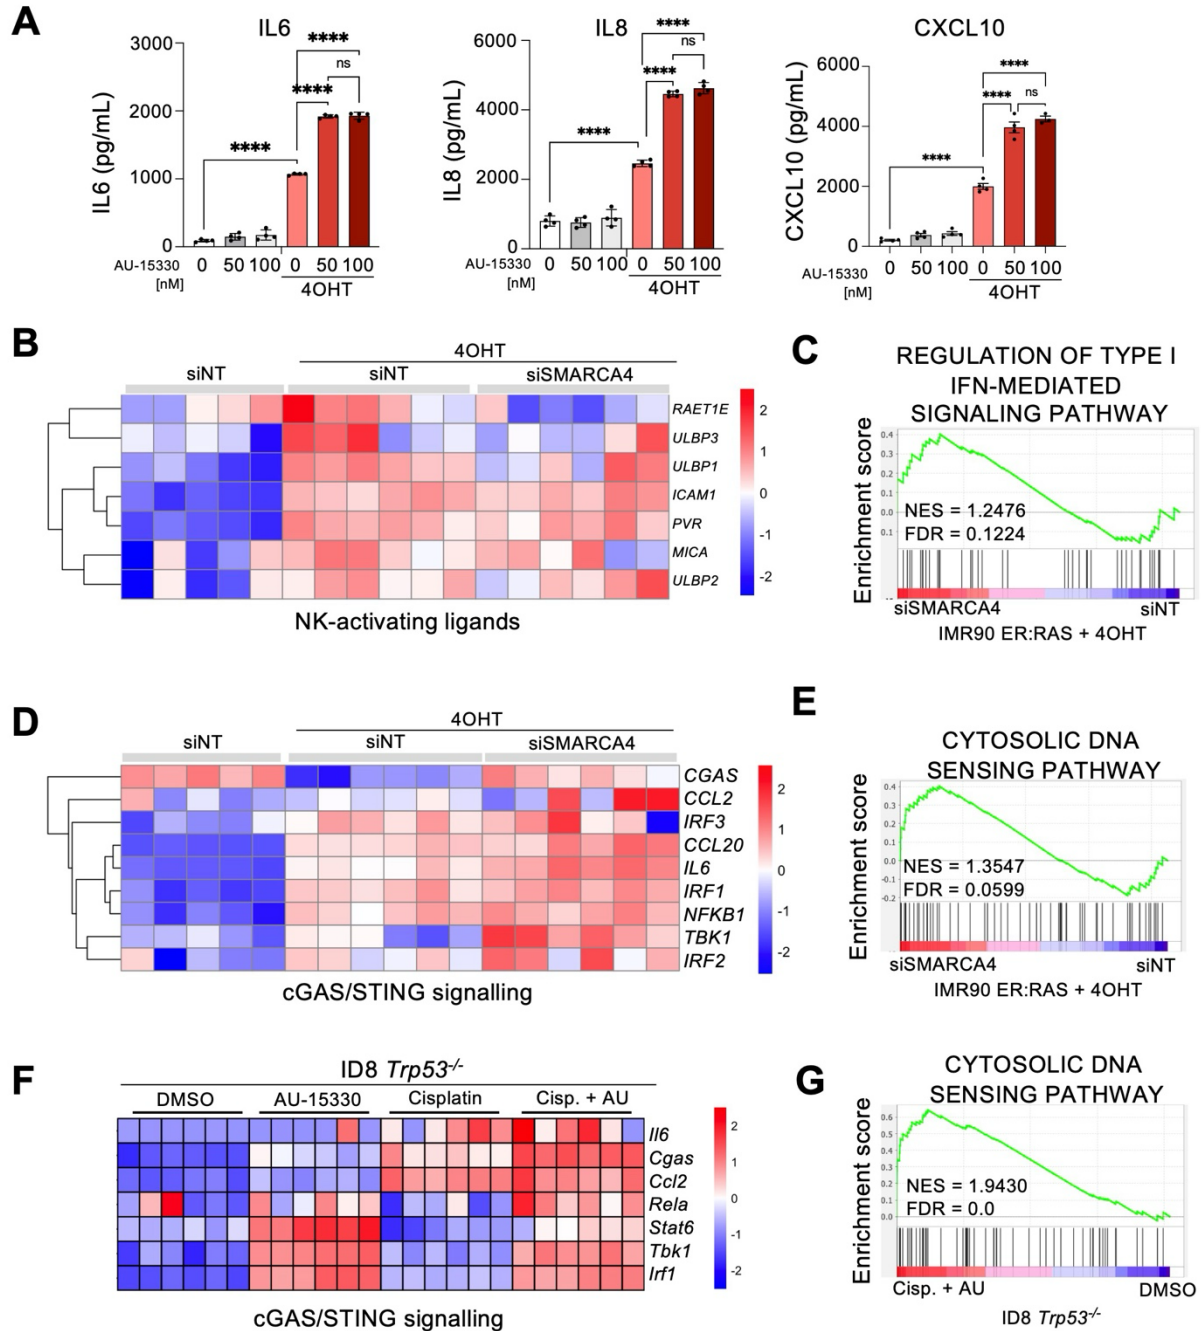

**Figure S9. Treatment with AU-15330 activates cGAS/STING signalling.** (A) Quantification of the indicated cytokine secreted from IMR90 ER:RAS cells 7 days following DMSO or 4OHT treatment and treated with AU-15330 at day 4, as assessed by ELISA. Data represents mean  $\pm$  SEM (n = 4). \*\*\*\*p < 0.0001; ns, not significant; ordinary one-way ANOVA (Dunnett's multiple comparisons test). (B) Heatmap of RNA-Seq data showing the expression of NK-activating ligands in DMSO or 4OHT-treated IMR90 ER:RAS cells and transfected with siNT or siSMARCA4. (C) GSEA enrichment plot of

regulation of type I IFN-mediated signalling pathway signature in senescent IMR90 ER:RAS cells transfected with siSMARCA4. **(D)** Heatmap of RNA-Seq data showing the expression of cGAS/STING signalling in DMSO or 4OHT-treated IMR90 ER:RAS cells transfected with siNT or siSMARCA4. **(E)** GSEA enrichment plot of the regulation of Cytosolic DNA sensing pathway signature in senescent IMR90 ER:RAS cells transfected with siSMARCA4. **(F)** Heatmap of RNA-Seq data showing the expression of cGAS/STING signalling in ID8 *Trp53*<sup>-/-</sup> cells treated with DMSO, AU-15330, cisplatin or cisplatin and AU-15330 combined. **(G)** GSEA plot of the Cytosolic DNA sensing pathway signature in ID8 *Trp53*<sup>-/-</sup> cells treated with DMSO or cisplatin + AU-15330.

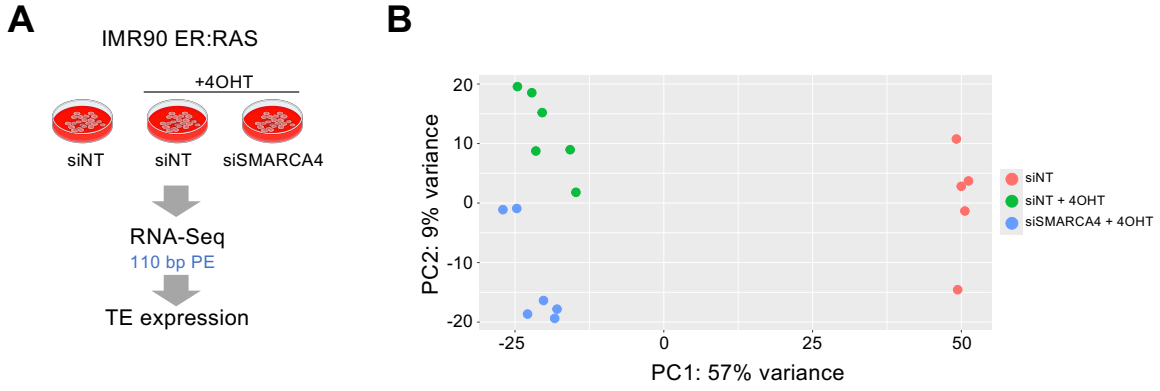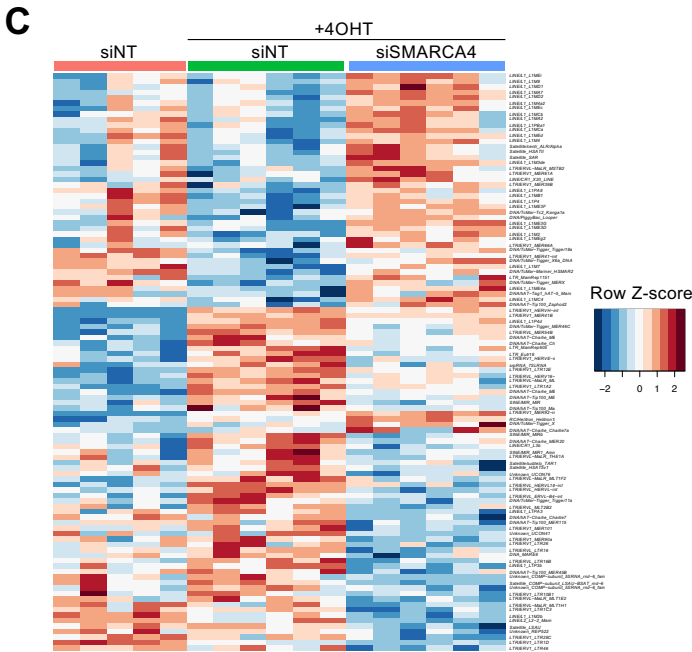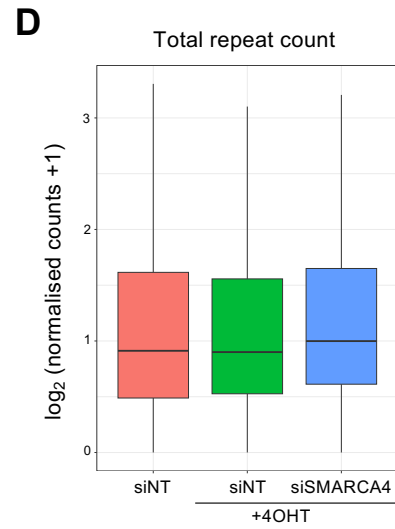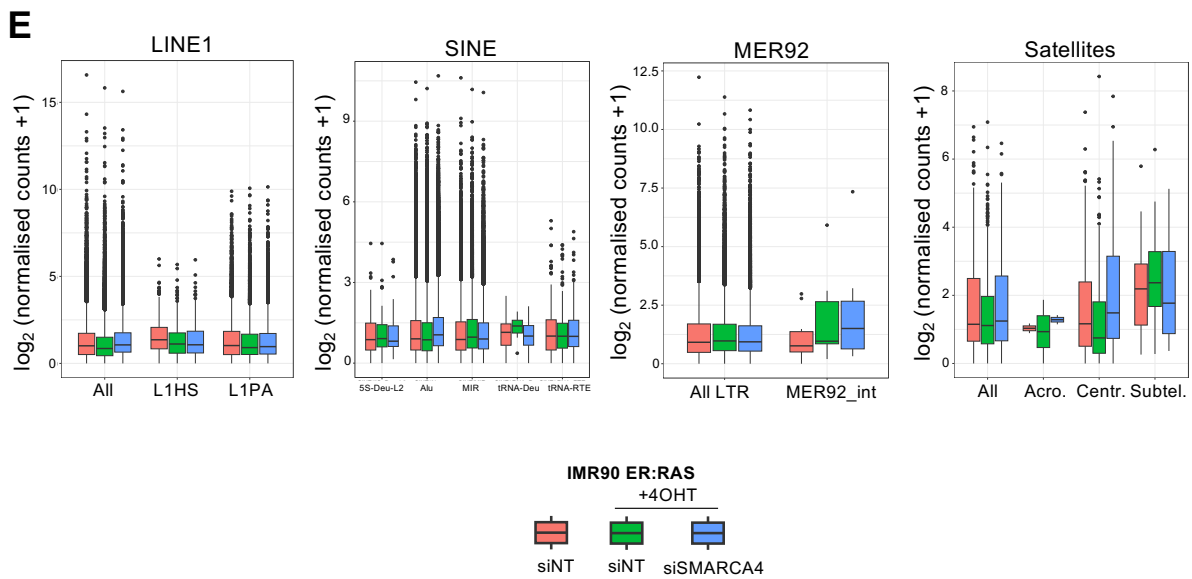

**Figure S10. Effect of SMARCA4 knockdown on the expression of repeat and transposable elements in senescent cells.** **(A)** Scheme showing the set-up of the RNA-Seq experiment to assess transposable and repeat element expression upon SMARCA4 knockdown. **(B)** Principal Components Analysis (PCA) plot of expression at repetitive element loci in IMR90 ER:RAS cells treated with DMSO or 4OHT and siNT or siSMARCA4. PC1 and PC2 are shown. **(C)** Heatmap showing expression of repetitive element subfamilies in IMR90 ER:RAS cells treated with DMSO or 4OHT and siNT or siSMARCA4. Subfamilies shown were those significantly different between siSMARCA4 + 4OHT vs siNT + 4OHT (DESeq2,  $p$  adj <0.05). **(D)** Boxplots of normalised expression (DESeq2 median of ratios) of all individual repetitive element loci expression in IMR90 ER:RAS cells treated with DMSO or 4OHT and siNT or siSMARCA4. Boxplot shows the median, first and third quartiles. Whiskers show 1.5 times the interquartile range. Outliers are not displayed. **(E)** Boxplots of normalised expression (DESeq2 median of ratios) of individual repetitive element loci of the indicated families in IMR90 ER:RAS cells treated with DMSO or 4OHT and siNT or siSMARCA4. Boxplot shows the median, first and third quartiles. Whiskers show 1.5 times the interquartile range and dots show outliers.

**A**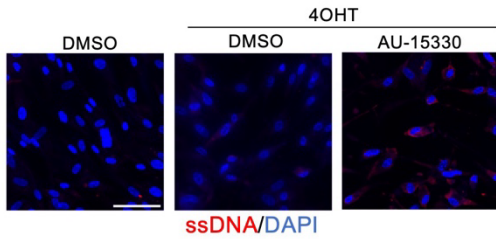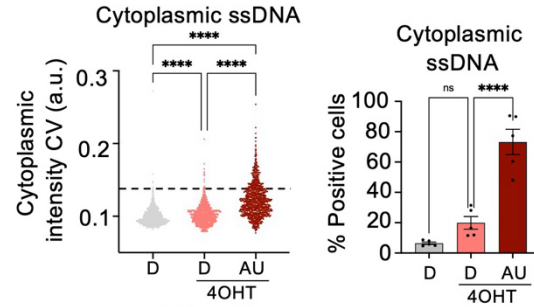**B**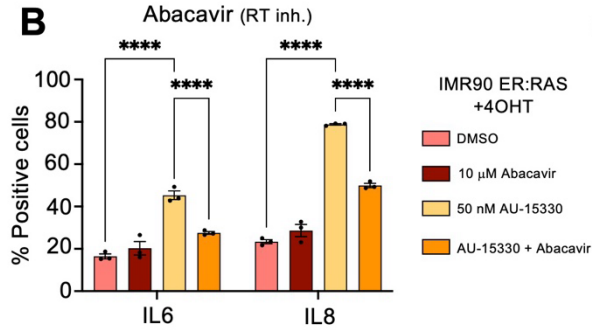**C**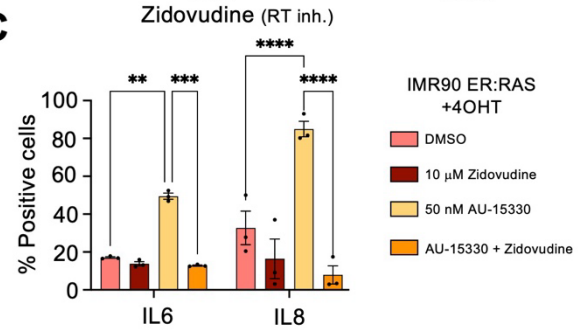**D**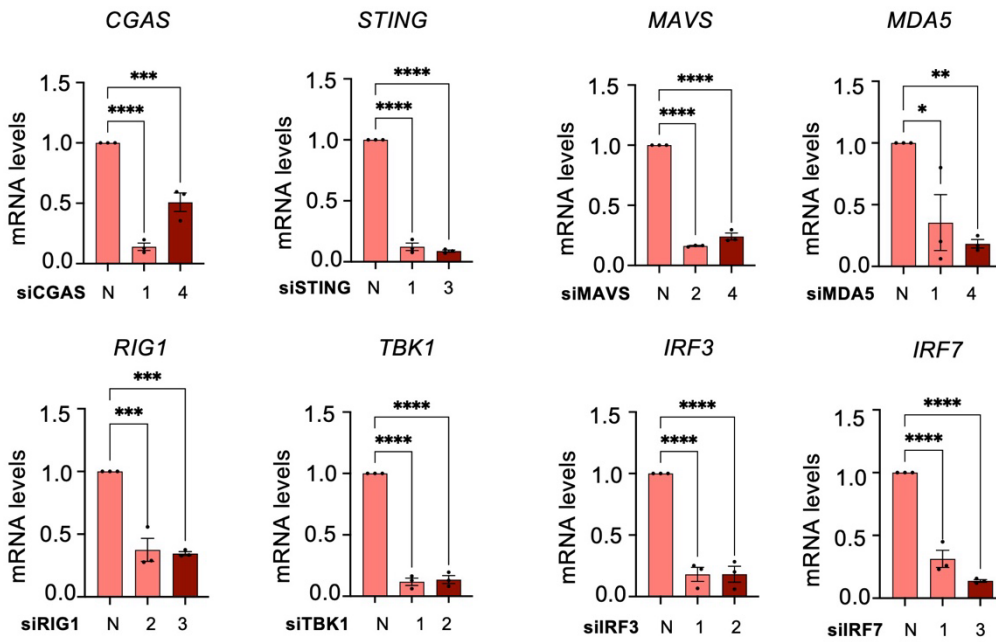**E**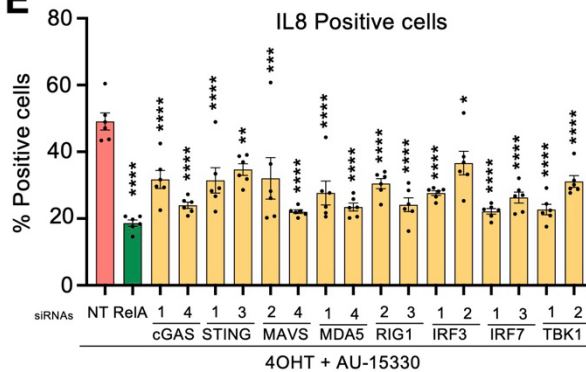**F**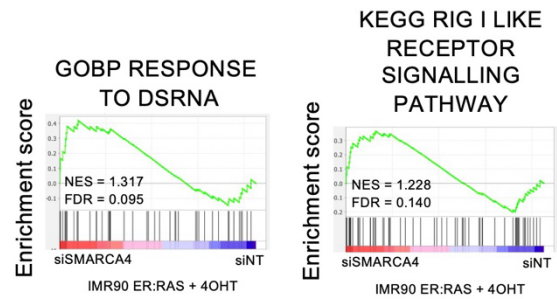

**Figure S11. Mechanisms explaining SASP induction upon AU-15330 treatment. (A)** Left panel, representative IF images of cytoplasmic ssDNA staining in IMR90 ER:RAS cells with the indicated treatments; Middle panel, quantification of cytoplasmic ssDNA intensity; Right panel, quantification of the percentage of cells positive for cytoplasmic ssDNA in IMR90 ER:RAS cells with and without AU-15330 treatment. \*\*\*\*p < 0.0001; ns, not significant; ordinary one-way ANOVA (Dunnett's multiple comparisons test). **(B-C)** Quantification of the percentage of IL6 and IL8 4OHT-induced IMR90 ER:RAS cells in the presence or absence of AU-15330 in combination with Abacavir **(B)** or Zidovudine **(C)** treatment. Data represents mean  $\pm$  SEM (n = 3). \*\*p < 0.01; \*\*\*p < 0.001; \*\*\*\*p < 0.0001; two-way ANOVA (Tukey's multiple comparisons test). **(D)** qRT-PCR analysis showing the mRNA expression of the indicated markers for the MAVS/RIG-1 pathway in IMR90 ER:RAS cells 3 days after being transfected with two selected siRNAs against the indicated genes. Data represents mean  $\pm$  SEM (n = 3). \*p < 0.05; \*\*p < 0.01; \*\*\*p < 0.001; \*\*\*\*p < 0.0001; ordinary one-way ANOVA (Dunnett's multiple comparisons test). **(E)** Quantification of the percentage of IL8 in 4OHT-induced IMR90 ER:RAS cells treated with AU-15330 following transfection with the indicated siRNAs. Data represents mean  $\pm$  SEM (n = 6). \*p < 0.05; \*\*\*\*p < 0.0001; two-way ANOVA (Šídák's multiple comparisons test). **(F)** GSEA enrichment plots of GOBP response to dsRNA and KEGG RIG I-like receptor signalling pathway signature in siSMRCA4 vs siNT transfected IMR90 ER:RAS senescent cells.

**A**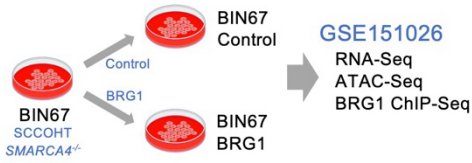**B**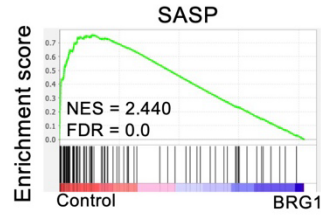**C**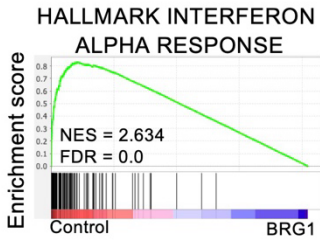**D**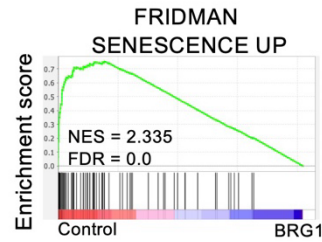**E**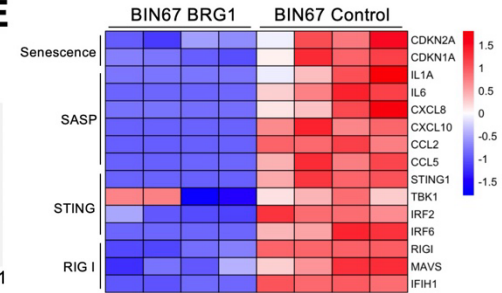**F**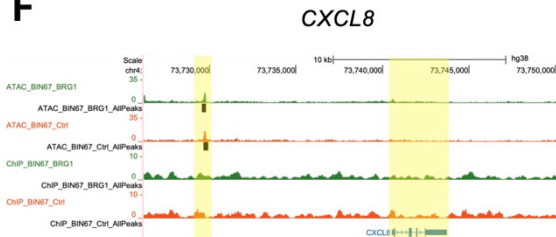**G**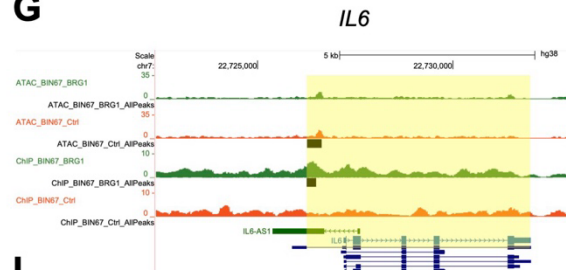**H**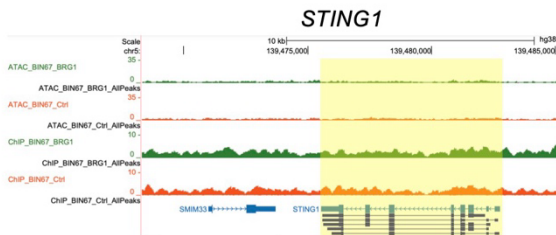**I**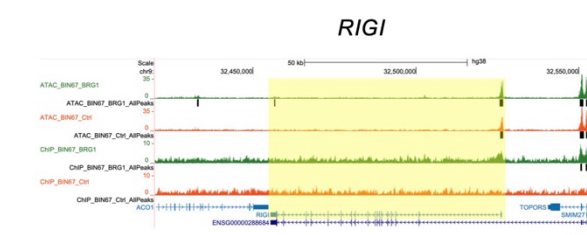**J**

| Motif | Name                                                    | p-value |
|-------|---------------------------------------------------------|---------|
|       | Fra1(bZIP)/BT549-Fra1-ChIP-Seq(GSE46166)/Homer          | 1e-1704 |
|       | Fra2(bZIP)/Striatum-Fra2-ChIP-Seq(GSE43429)/Homer       | 1e-1696 |
|       | JunB(bZIP)/DendriticCells-JunB-ChIP-Seq(GSE36099)/Homer | 1e-1623 |
|       | Atf3(bZIP)/GBM-ATF3-ChIP-Seq(GSE33912)/Homer            | 1e-1619 |
|       | BATF(bZIP)/Th17-BATF-ChIP-Seq(GSE39756)/Homer           | 1e-1588 |
|       | Fos12(bZIP)/3T3L1-Fos12-ChIP-Seq(GSE56872)/Homer        | 1e-1555 |
|       | AP-1(bZIP)/ThioMac-PU.1-ChIP-Seq(GSE21512)/Homer        | 1e-1509 |
|       | Jun-AP1(bZIP)/K562-cJun-ChIP-Seq(GSE31477)/Homer        | 1e-1384 |
|       | Bach2(bZIP)/OCILy7-Bach2-ChIP-Seq(GSE44420)/Homer       | 1e-697  |
|       | NF-E2(bZIP)/K562-NFE2-ChIP-Seq(GSE31477)/Homer          | 1e-271  |

**Figure S12. Effect of BRG1/SMARCA4 re-expression in BIN67 cells.** (A) GSE151026 dataset (49) investigating re-expression of SMARCA4/BRG1 in the Small Cell Carcinoma of Ovary, Hypercalcemic Type (SCCOHT) cell line BIN67. (B-D) GSEA enrichment plots of SASP (B), Interferon alpha (C) and Senescence (D) signatures in control (*SMARCA4* KO) and BIN67 cells re-expressing SMARCA4/BRG1. Data was reanalysed from GSE151026 dataset (49). (E) Heatmap derived of the RNA-Seq data showing the expression of selected genes involved in senescence, SASP, STING pathway, and RIGI pathway in control (*SMARCA4* KO) and BIN67 cells re-expressing SMARCA4/BRG1. Data was reanalysed from GSE151026 dataset (49). (F-I) UCSC genome browser tracks of ATAC-seq and BRG1/SMARCA4 ChIP-seq data in BIN67 cells (BIN67\_Ctrl) and BIN67 cells with re-expressed BRG1/SMARCA4 (BIN67\_BRG1) at the (F) *CXCL8*, (G) *IL6*, (H) *STING1*, and (I) *RIGI* loci, which are associated with oncogene-induced senescence. ATAC-seq peak bed files are displayed below the corresponding tracks, and regions of interest are highlighted in yellow. (J) Top DNA motifs (known motifs) detected by HOMER v4.11 ( $p < 0.05$ ) for ATAC-seq peaks gained upon BRG1/SMARCA4 re-expression. ChIP-seq, ATAC-seq, and RNA-seq data were obtained from GSE151026 (49).



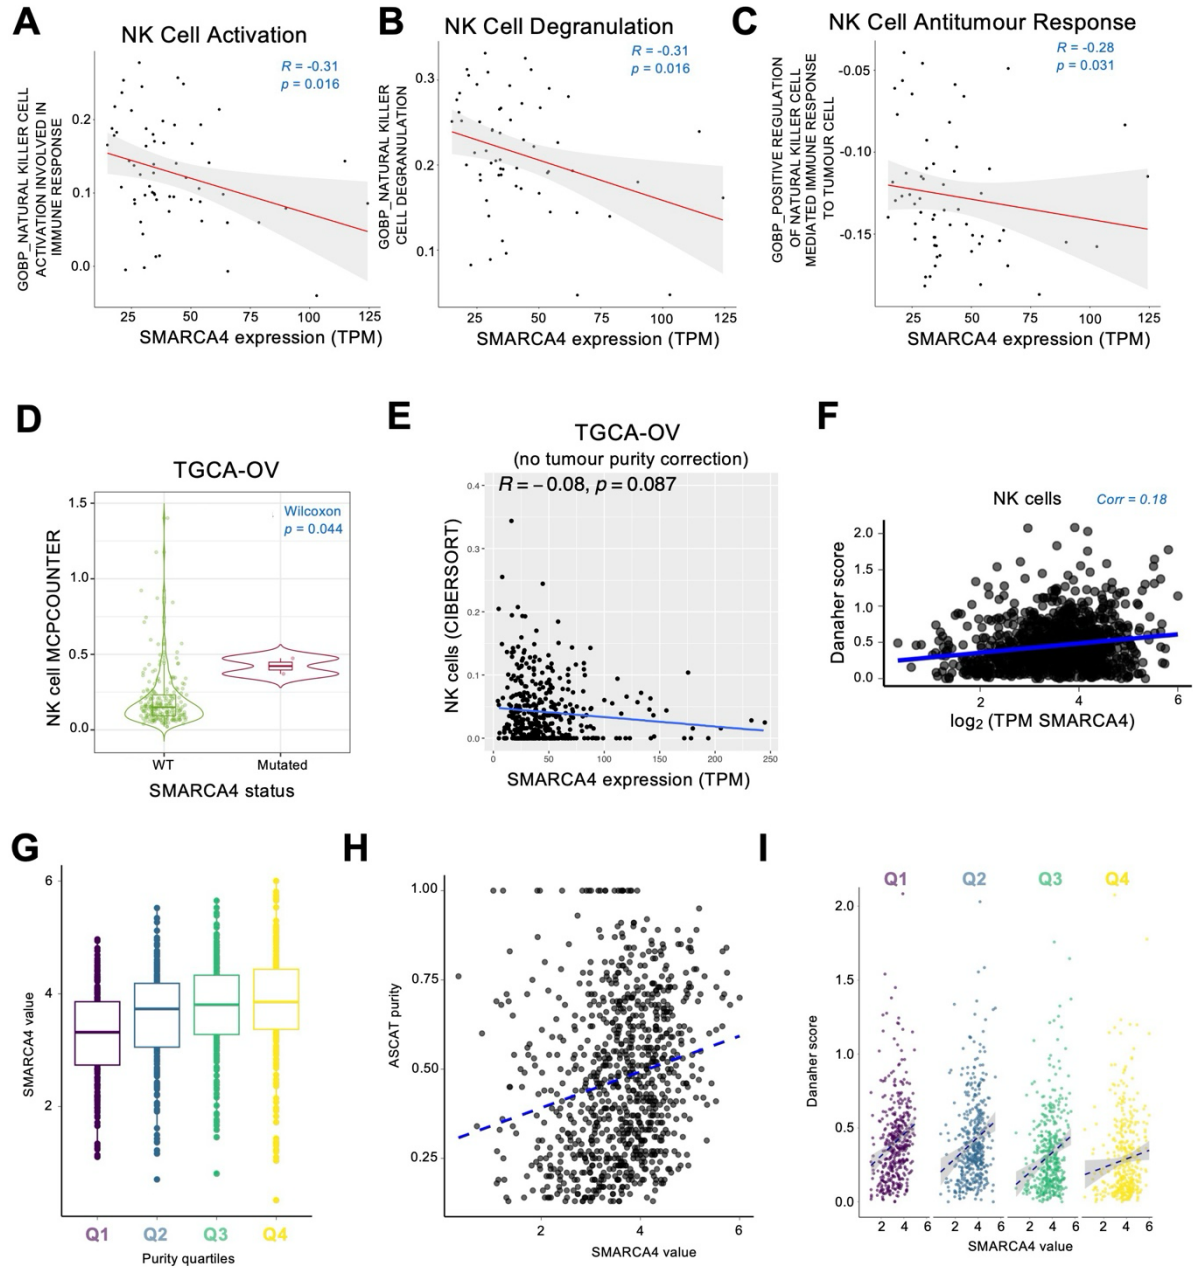

**Figure S13. Correlation between SMARCA4 levels and infiltration of NK cells in ovarian and lung cancer patients. (A-C)** Correlation in the OCTIPS cohort. **(A)** Spearman’s correlation between the score for the Gene Ontology Biological Pathway (GOBP) “natural killer cell activation involved in immune response” geneset, and expression of *SMARCA4* in TPM. **(B)** Spearman’s correlation between the score for the GOBP “natural killer cell degranulation” geneset, and expression of *SMARCA4* in TPM. **(C)** Spearman’s correlation between the score for the GOBP “positive regulation of natural killer cell-mediated immune response to tumour cell” geneset, and expression of

*SMARCA4* in TPM. GOBP geneset scores for OCTIPS samples are calculated by singscore (78).  $R$  = Spearman  $r$ ,  $p$  =  $p$ -value. The linear regression line is in red, with grey-shaded areas representing confidence intervals. **(D)** Violin plot illustrating the infiltration levels of NK cells, as estimated by MCPcounter, in ovarian serous adenocarcinoma samples ( $n = 411$ ) from The Cancer Genome Atlas (TCGA-OV) dataset, using TIMER2.0 (<http://timer.cistrome.org>). Samples are categorised based on *SMARCA4* mutation status, with 407 samples displaying wild-type (WT) *SMARCA4* and 4 samples harbouring *SMARCA4* mutations.  $p = 0.044$ , Wilcoxon rank-sum test, by TIMER2.0. **(E)** Spearman's correlation between absolute NK cell infiltration as inferred by CIBERSORTx (51) and expression of *SMARCA4* in transcripts per million (TPM) in the TCGA-OV cohort ( $n=422$ ) before correction for tumour purity.  $R$  = Spearman  $r$ ,  $p$  =  $p$ -value. **(F)** Scatter-plot showing the Danaher score for NK cells on the y-axis and the expression value of *SMARCA4* on the x-axis. **(G)** Boxplots of the *SMARCA4* values ( $\log_2(\text{TPM}_{SMARCA4})$ ) on the y-axis and purity quartiles on the x-axis for the TRACERx samples. **(H)** Scatter-plot showing the purity calculation for TRACERx samples on the y-axis and the expression value for *SMARCA4* on the x-axis. **(I)** Scatter plot with a fitted linear model showing the Danaher score for NK cells from TRACERx samples on the y-axis and the expression value for *SMARCA4* on the x-axis, faceted by purity quartiles.

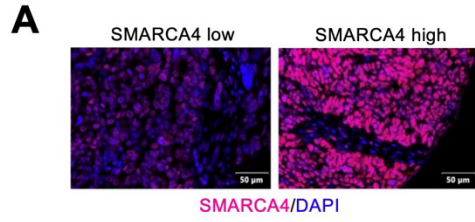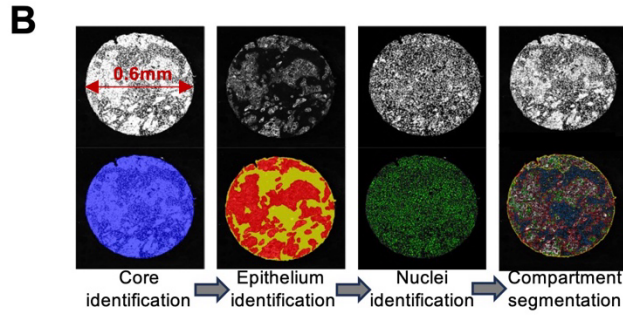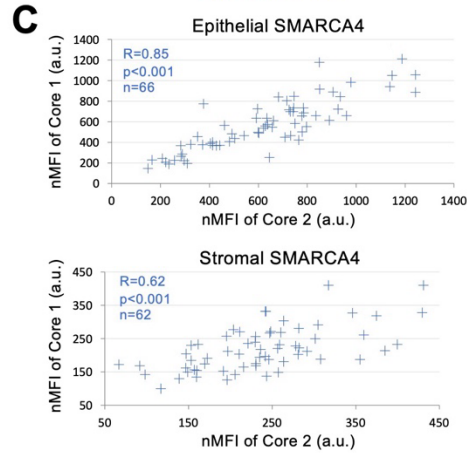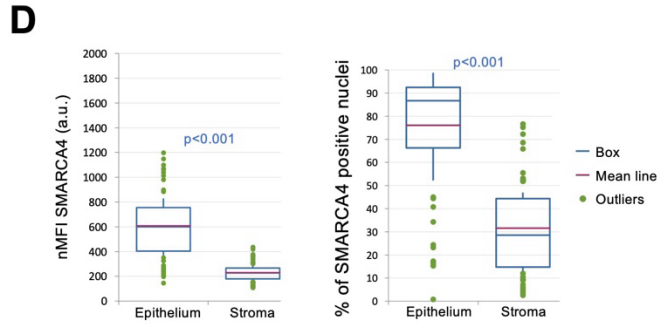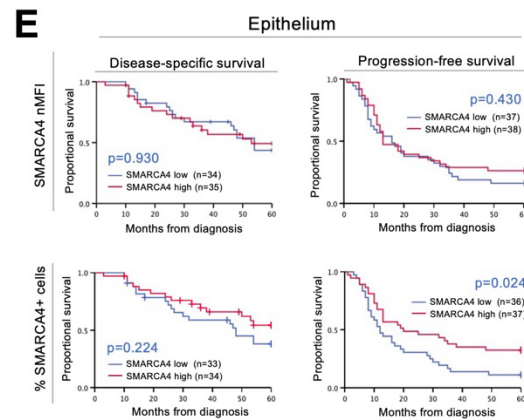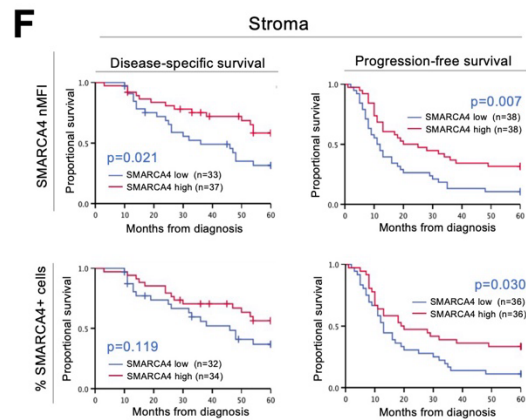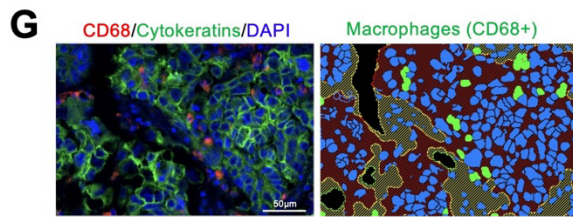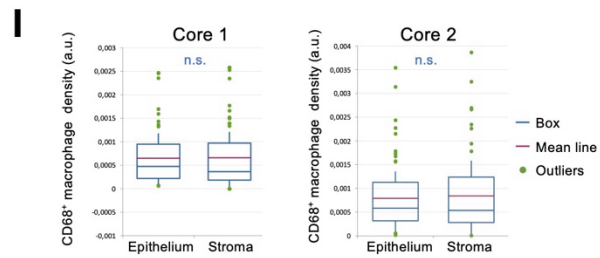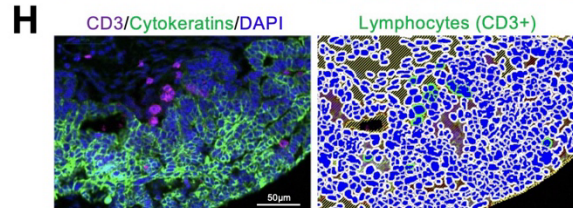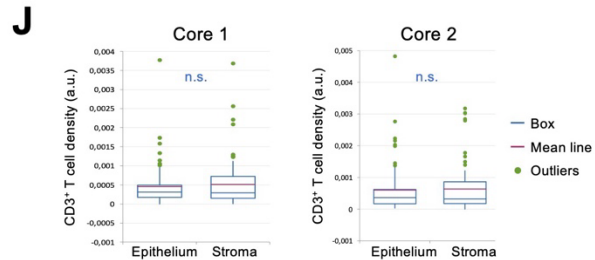

**K**

| Association between immune cell density and SMARCA4 expression levels in all compartments |  | Cores 1  |                | Cores 2  |         |
|-------------------------------------------------------------------------------------------|--|----------|----------------|----------|---------|
| Immune cells - Cell count divided by area                                                 |  | R        | p              | R        | p       |
| SMARCA4 - nuclear MFI or %cst+                                                            |  |          |                |          |         |
| SMARCA4% - CD68+ epithelial                                                               |  | 0,00247  | 0,98402        | 0,13813  | 0,25770 |
| SMARCA4MFI - CD68+ epithelial                                                             |  | -0,30930 | <b>0,01444</b> | 0,19606  | 0,11753 |
| SMARCA4% - CD68+ stromal                                                                  |  | 0,12680  | 0,29916        | -0,00397 | 0,97554 |
| SMARCA4MFI - CD68+ stromal                                                                |  | -0,16776 | 0,17816        | -0,10769 | 0,42951 |
| SMARCA4% - CD3+ epithelial                                                                |  | 0,02760  | 0,82319        | 0,04026  | 0,74260 |
| SMARCA4MFI - CD3+ epithelial                                                              |  | -0,13934 | 0,28008        | -0,03611 | 0,77174 |
| SMARCA4% - CD3+ stromal                                                                   |  | 0,09453  | 0,43296        | -0,12277 | 0,34179 |
| SMARCA4MFI - CD3+ stromal                                                                 |  | -0,05537 | 0,65136        | 0,11142  | 0,39263 |

**Figure S14. Single-cell analysis of SMARCA4 in ovarian cancer tissues and association with clinical outcome and immune cells.** (A) Representative multiplex immunofluorescence images of cores with low (left) or high (right) SMARCA4 expression. (B) The pipeline of core tissue identification, segmentation in the epithelium (red) and stroma (yellow), nuclei identification (green), and compartment assignation. Core diameter is 0.6 mm. (C) Correlation of nuclear SMARCA4 mean fluorescence intensity (nMFI) in the epithelium (top) and stroma (bottom) between the first core (Y-axis) and second core (X-axis) for each patient. (D) Nuclear MFI (left) and percentage of SMARCA4 positive nuclei (right) in the epithelium and stroma. (E-F) Percentile 50 Kaplan-Meier analysis of disease-specific survival and progression-free survival based on the SMARCA4 nMFI and percentage of SMARCA4+ cells in the epithelium (E) or the stroma (F). (G-H) Detection of CD68+ macrophages (G) or CD3+ lymphocytes (H). Left, representative immunofluorescence image; right, same image processed for cell detection (hatched yellow, stroma; hatched red, epithelium; green label, immune cells). (I-J) CD68+ macrophage (I) or CD3+ lymphocyte (J) density analysis in the epithelial and stromal compartment in the first (left) or the second (right) tissue core of each patient. (K) Associations between immune cell density and SMARCA4 expression levels in all compartments. Pearson's linear correlation was calculated in (C) and (K). Mann–Whitney U test was used to calculate significance in (D), (I) and (J). n.s., non-significant.

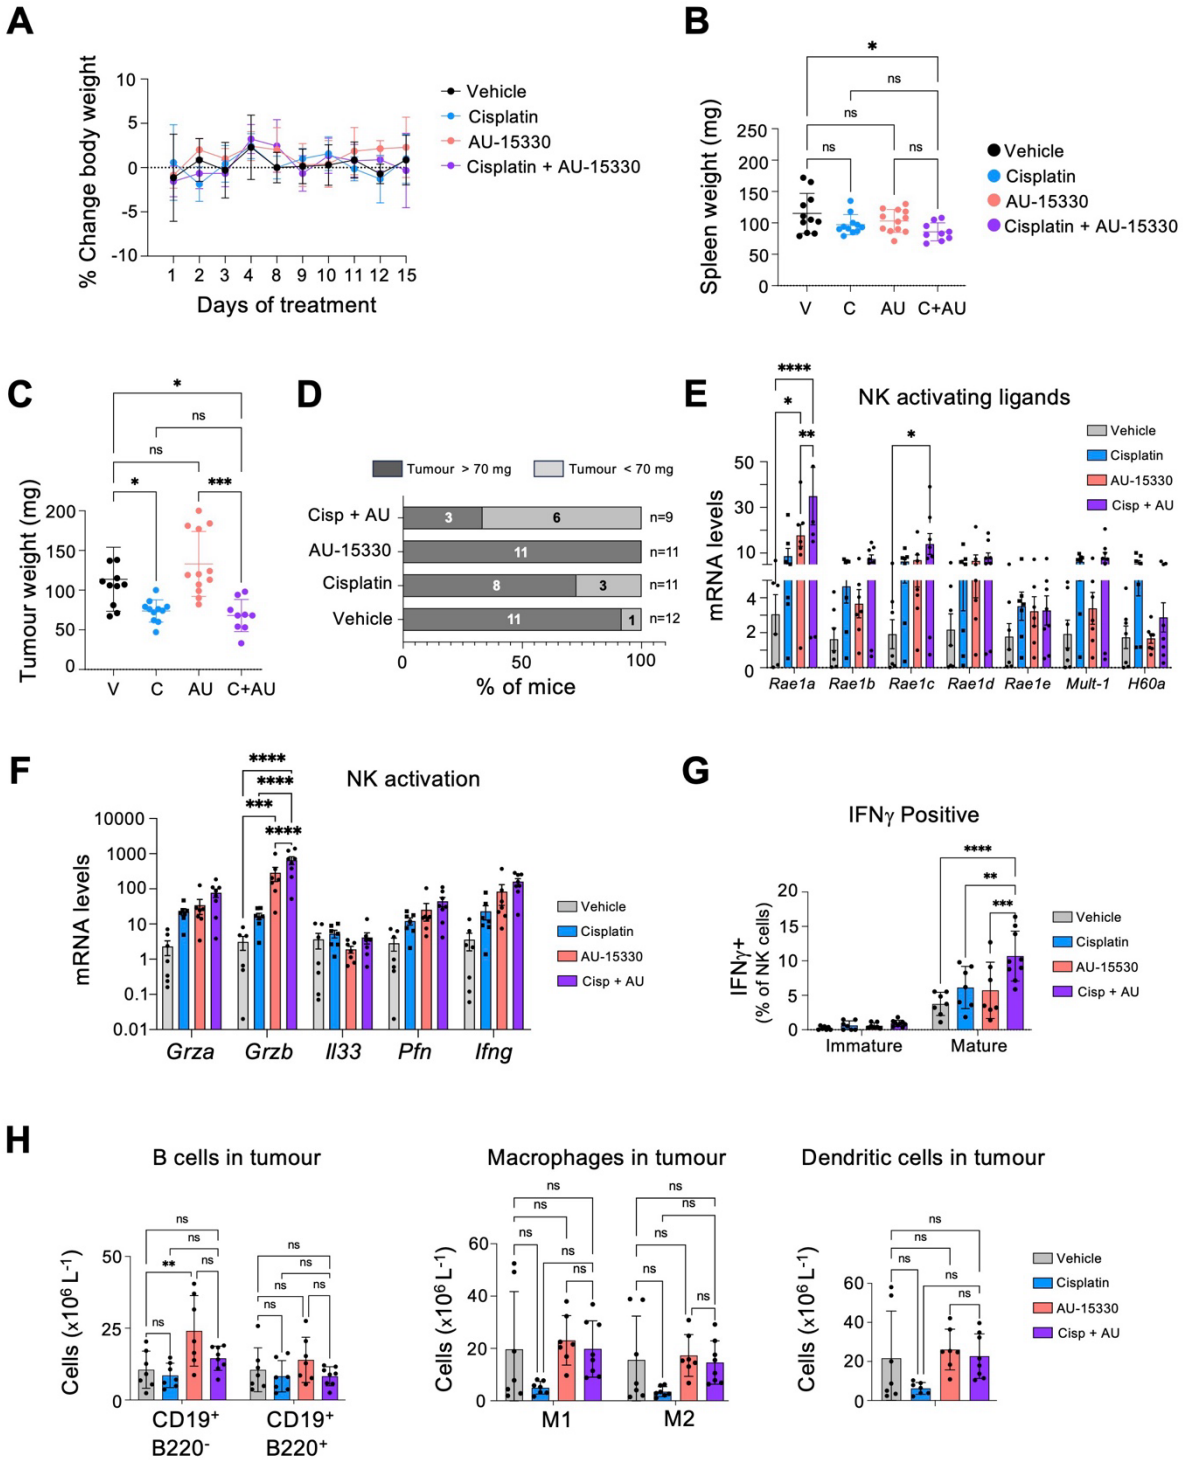

**Figure S15. Effects of combined cisplatin and intraperitoneal AU-15330 treatment in a mouse model of ovarian cancer. (A)** Change in mice body weight (%) during drug administration. n = 7 mice for V, C and AU groups; n = 9 for C+AU. **(B)** Spleen weight (mg) of mice treated with vehicle (V), cisplatin (C), AU-15330 (AU) and cisplatin in

combination with AU-15330 (C+AU). Data represents mean  $\pm$  SD. \* $p < 0.05$ , ns, not significant; two-way ANOVA (Tukey's multiple comparisons test). **(C)** Tumour weight (mg) of mice treated with vehicle (V), cisplatin (C), AU-15330 (AU) and cisplatin in combination with AU-15330 (C+AU). Data represents mean  $\pm$  SD. \* $p < 0.05$ ; \*\*\* $p < 0.001$ ; ns, not significant; two-way ANOVA (Tukey's multiple comparisons test). **(D)** Quantification of the percentage of mice with a tumour weight below 70 mg in the indicated experimental group from the experiment shown in **(C)**. For **B-D**,  $n = 11$  mice for V and C;  $n = 12$  mice for AU;  $n = 9$  for C+AU. **(E-F)** mRNA expression levels of markers for NK activating ligands **(E)** and immune activation **(F)** in omental tumours measured by qRT-PCR. Data represents mean  $\pm$  SEM. \* $p < 0.05$ ; \*\* $p < 0.01$ ; \*\*\* $p < 0.001$ ; \*\*\*\* $p < 0.0001$ ; two-way ANOVA (Tukey's multiple comparisons test). **(G)** Levels of IFN $\gamma$  secretion measured by flow cytometry in omental tumours. Data represents mean  $\pm$  SD. \*\* $p < 0.01$ ; \*\*\* $p < 0.001$ ; \*\*\*\* $p < 0.0001$ ; two-way ANOVA (Tukey's multiple comparisons test). **(H)** Flow cytometry analysis of B cells, Macrophages and Dendritic cell counts in omental tumours. Data represents mean  $\pm$  SD. \*\* $p < 0.01$ ; ns, not significant; two-way ANOVA (Šídák's multiple comparisons test). For **E-H**,  $n = 7$  mice for V, C and AU groups;  $n = 8$  for C+AU.

**A**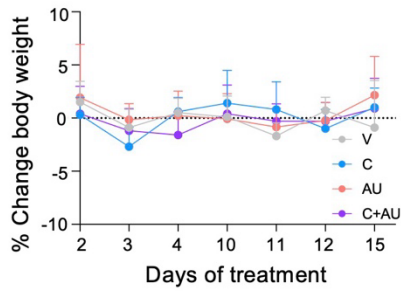**B**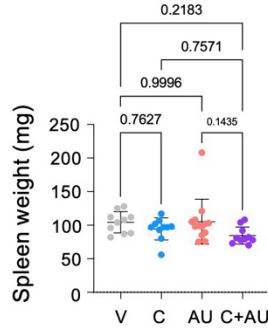**C**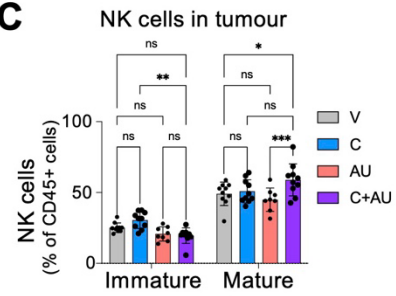**D**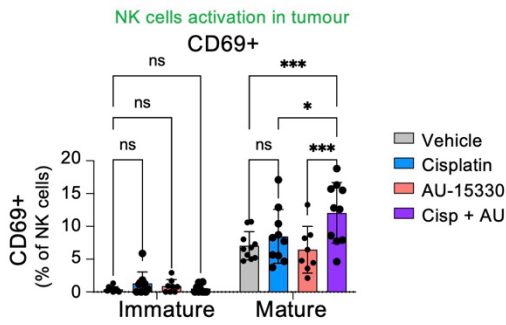**E**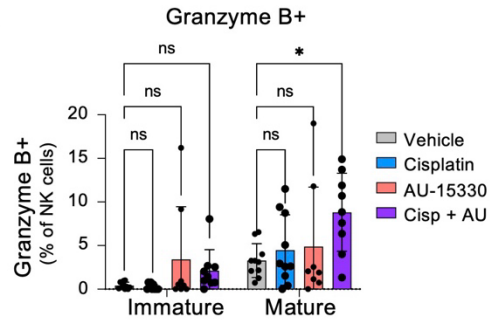**F**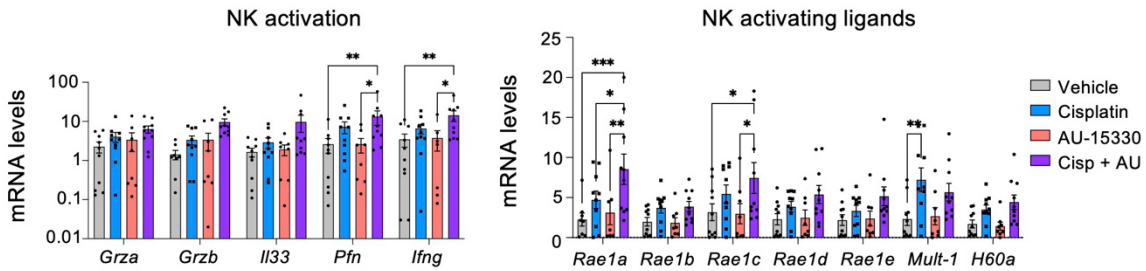**G**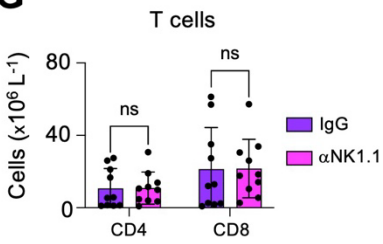**H**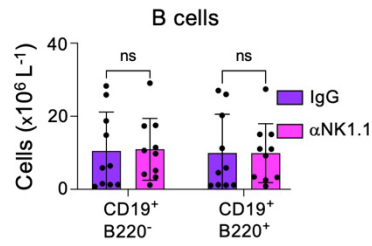**I**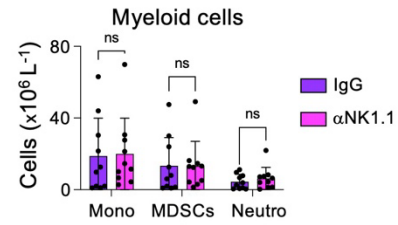**J**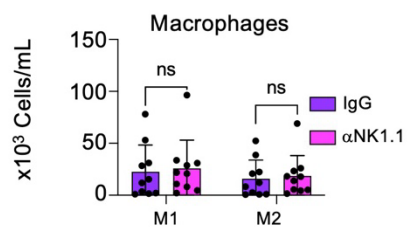**K**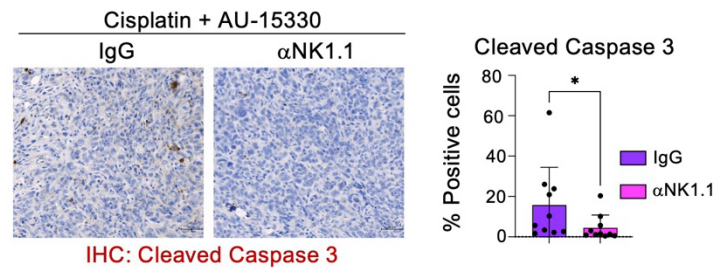

**Figure S16. Effects of combined cisplatin and intravenous AU-15330 treatment in a mouse model of ovarian cancer.** (A) Change in mice body weight (%) during drug administration. (B) Spleen weight (mg) of mice treated with vehicle (V), cisplatin (C), AU-15330 (AU) and cisplatin in combination with AU-15330 (C+AU). Data represents mean  $\pm$  SD. One-way ANOVA (Tukey's multiple comparisons test). For **A-B**, n = 10 mice for V, C and C+AU groups; n = 13 for AU. (C) Flow cytometry analysis of the percentage of NK cells in the omental tumours. Data represents mean  $\pm$  SD. \*p<0.05; \*\*p<0.01; \*\*\*p<0.001; ns, not significant; two-way ANOVA (Tukey's multiple comparisons test). (D) Flow cytometry analysis of NK cell activation (% of CD69+ NK cells) in omental tumours. Data represents mean  $\pm$  SD. \*p<0.05; \*\*\*p<0.001; ns, not significant; two-way ANOVA (Tukey's multiple comparisons test). (E) Levels of Granzyme B secretion measured by flow cytometry in omental tumours. Data represents mean  $\pm$  SD. \*p<0.05; ns, not significant; two-way ANOVA (Tukey's multiple comparisons test). (F) mRNA expression levels of markers of immune activation in omental tumours and NK activating ligands measured by qRT-PCR. Data represents mean  $\pm$  SD. \*p<0.05; \*\*p<0.01; two-way ANOVA (Tukey's multiple comparisons test). For **C-F**, n = 10 mice for V, C and C+AU groups; n = 8 for AU. (G-J) Flow cytometry analysis of T cell count (G), B cell count (H), myeloid cell count (I) and macrophages count (J) in omental tumours from mice treated with C+AU+IgG and C+AU+ $\alpha$ NK1.1. Data represents mean  $\pm$  SD. ns, not significant; two-way ANOVA (Šídák's multiple comparisons test). (K) Representative images (left) and quantification (right) of Cleaved-Caspase 3 staining in omental tumours treated with C+AU+IgG or C+AU+ $\alpha$ NK1.1. Scale bar, 50  $\mu$ m. Data represents mean  $\pm$  SD. \*p < 0.05; two-way ANOVA (Tukey's multiple comparisons test). For **G-K**, n = 10 mice for C+AU+IgG and C+AU+  $\alpha$ NK1.1 groups.



## SUPPLEMENTARY TABLES

**Table S1. Candidates identified in the primary SASP.** Related to Fig. 1, it is included as an Excel file.

**Table S2. Hits of the screens for siRNAs superinducing SASP.** Related to Fig. 1, it is included as an Excel file.

**Table S3. Hits of the screen for siRNAs enhancing NK-mediated killing of senescent cells.** Related to Fig. 2, it is included as an Excel file.

**Table S4. Chemical compounds.**

| <b>Chemical compounds</b> | <b>CAS Number</b> | <b>Supplier</b> | <b>Catalogue number</b> |
|---------------------------|-------------------|-----------------|-------------------------|
| 4-OHT                     | 68392-35-8        | Sigma-Aldrich   | H7904                   |
| SGC-SMARCA-BRDVIII        | 1997319-84-2      | Sigma-Aldrich   | SML3094                 |
| Etoposide                 | 33419-42-0        | Sigma-Aldrich   | E1383                   |
| Indisulam                 | 165668-41-7       | Sigma-Aldrich   | SML1225                 |
| AU-15330                  | 2380274-50-8      | MedChemExpress  | HY-145388               |
| Cisplatin                 | 15663-27-1        | APExBIO         | A8321                   |
| G150                      | 2369751-30-2      | Selleckchem     | S8944                   |
| C171                      | 2244881-69-2      | Selleckchem     | E0128                   |
| C176                      | 314054-00-7       | MedChemExpress  | HY-112906               |
| Lamivudine (3TC)          | 134678-17-4       | MedChemExpress  | HY-B0250                |
| Abacavir                  | 136470-78-5       | MedChemExpress  | HY-17423                |
| Zidovudine                | 30516-87-1        | MedChemExpress  | HY-17413                |

**Table S5. Primary antibodies used for IF and IHC.**

| Target                     | Clone      | Manufacturer              | Catalogue number | H/M* | Dilution | RRID        |
|----------------------------|------------|---------------------------|------------------|------|----------|-------------|
| <b>53BP1</b>               | Polyclonal | Novus Biologicals         | NB100-304        | H    | 1:1000   | AB_350221   |
| <b>γ-H2AX</b>              | JWB301     | Millipore                 | 05-636           | H, M | 1:100    | AB_2755003  |
| <b>BrdU</b>                | 3D4        | BD Biosciences            | 555627           | H    | 1:1000   | AB_395993   |
| <b>CCL2</b>                | Polyclonal | R&D Systems               | AF-279-NA        | H    | 1:250    | AB_354441   |
| <b>IL1α</b>                | 4414       | R&D Systems               | MAB-200          | H    | 1:250    | AB_2295862  |
| <b>IL1β</b>                | 8516       | R&D Systems               | MAB-201          | H    | 1:250    | AB_358006   |
| <b>IL6</b>                 | Polyclonal | R&D Systems               | AF-206-NA        | H    | 1:250    | AB_354392   |
| <b>IL8/CXCL8</b>           | 6217       | R&D Systems               | MAB-208          | H    | 1:250    | AB_2249110  |
| <b>p16<sup>INK4a</sup></b> | JC8        | CRUK                      | -                | H    | 1:1000   |             |
| <b>p21<sup>CIP1</sup></b>  | 12D1       | Cell Signaling Technology | 2947             | H    | 1:2000   | AB_823586   |
| <b>BRG1 (SMARCA4)</b>      | EPNCIR111A | Abcam                     | Ab110641         | H, M | 1:500    | AB_10861578 |
| <b>p21<sup>CIP1</sup></b>  | EPR18021   | Abcam                     | Ab188224         | M    | 1:500    | AB_2734729  |
| <b>CXCL10</b>              | 10H11L3    | Thermo Fisher Scientific  | 701225           | H, M | 1:500    | AB_2532429  |
| <b>KI67</b>                | SP6        | Thermo Fisher Scientific  | MA5-14520        | H, M | 1:500    | AB_10979488 |

|                           |             |                                 |                |      |       |             |
|---------------------------|-------------|---------------------------------|----------------|------|-------|-------------|
| <b>N-RAS</b>              | F155        | Santa Cruz<br>Technology        | Sc-31          | M    | 1:500 | AB_628041   |
| <b>ORF1p</b>              | 4H1         | Sigma<br>Aldrich                | MABC1152       | H    | 1:250 | AB_2941775  |
| <b>cGAS</b>               | D-9         | Santa Cruz<br>Technology        | sc-515777      | H    | 1:250 | AB_2734736  |
| <b>pSTING</b>             | D8K6H       | Cell<br>Signaling<br>Technology | 40818          | H, M | 1:800 | AB_2799187  |
| <b>pTBK1</b>              | D52C2       | Cell<br>Signaling<br>Technology | 5483s          | H, M | 1:100 | AB_10693472 |
| <b>PIRF3</b>              | 4D4G        | Cell<br>Signaling<br>Technology | 4947s          | H, M | 1:500 | AB_823547   |
| <b>ssDNA</b>              | TNT-3       | Sigma<br>Aldrich                | MAB3868        | H, M | 1:100 | AB_570342   |
| <b>dsDNA</b>              | rDSD/4565   | Novus<br>Biologicals            | NBP3-<br>07670 | H, M | 1:100 | AB_3107112  |
| <b>dsRNA</b>              | rJ2         | Sigma<br>Aldrich                | MABE1134       | H, M | 1:100 | AB_2819101  |
| <b>CD68</b>               | PG-M        | Dako                            | M0876          | H    | 1:50  | AB_2074844  |
| <b>CD3</b>                | CD3-12      | Abcam                           | Ab11089        | H, M | 1:200 | AB_2889189  |
| <b>Cytokeratin<br/>7</b>  | OV-TL12/30  | Novus                           | NBP2-<br>44814 | H, M | 1:200 | -           |
| <b>Cytokeratin<br/>18</b> | DC-10       | Santa Cruz                      | sc-6259        | H    | 1:200 | AB_627850   |
| <b>Cytokeratin<br/>19</b> | A53-B/A2.26 | Novus                           | NBP2-<br>15186 | H    | 1:200 | -           |

\*Reactivity: H, human; M, mouse.

**Table S6. Antibodies used for flow cytometry analysis.**

| <b>Antigen</b> | <b>Fluorophore</b> | <b>Company</b> | <b>Clone</b> | <b>Catalogue number</b> | <b>RRID</b> |
|----------------|--------------------|----------------|--------------|-------------------------|-------------|
| CD45           | BV605              | BioLegend      | 30-F11       | 103140                  | AB_2650656  |
| CD3            | FITC               | BioLegend      | 17A2         | 100204                  | AB_312660   |
| CD19           | Pe-Cy7             | Invitrogen     | 1D3          | 25-0193-82              | AB_657663   |
| NK1.1          | PE                 | BioLegend      | PK136        | 108707                  | AB_313394   |
| CD4            | APC-Cy7            | BioLegend      | GK1.5        | 100414                  | AB_312698   |
| CD49b          | APC                | BioLegend      | DX5          | 108909                  | AB_313416   |
| B220           | BV711              | BioLegend      | RA3-6B2      | 103255                  | AB_2563491  |
| CD8            | BV650              | BioLegend      | 53-6.7       | 100741                  | AB_2563056  |
| CD11b          | BV421              | BioLegend      | M1/70        | 101251                  | AB_11203704 |
| CD11c          | PerCP-Cy5.5        | BioLegend      | N418         | 117327                  | AB_2129642  |
| F4/80          | PE                 | BioLegend      | BM8          | 123110                  | AB_893486   |
| MHCII          | BV510              | BioLegend      | M5/114.15.2  | 107635                  | AB_2561397  |
| CD206          | APC                | BioLegend      | C068C2       | 141707                  | AB_10896057 |
| LY6C           | FITC               | BioLegend      | HK1.4        | 128005                  | AB_1186134  |
| LY6G           | APC-Cy7            | BioLegend      | 1A8          | 127623                  | AB_10645331 |
| CD107a         | FITC               | BioLegend      | 1D4B         | 121605                  | AB_572006   |
| CD69           | PerCP              | BioLegend      | H1.2F3       | 104520                  | AB_940495   |
| NKG2D          | BV711              | BD             | CX5          | 563694                  | AB_2722498  |
| NKp46          | BV650              | BioLegend      | 29A1.4       | 137635                  | AB_2734200  |
| IFN- $\gamma$  | PerCP-Cy5.5        | BioLegend      | XMG1.2       | 505821                  | AB_961359   |
| Granzyme B     | Pacific Blue       | BioLegend      | GB11         | 515407                  | AB_2562196  |

**Table S7. Secondary antibodies used in this study.**

| <b>Target</b>           | <b>Clone / Conjugate</b>      | <b>Manufacturer</b> | <b>Catalogue number</b> | <b>Dilution</b> | <b>RRID</b> |
|-------------------------|-------------------------------|---------------------|-------------------------|-----------------|-------------|
| <b>Goat IgG (H+L)</b>   | Polyclonal / AlexaFluor® 594  | Invitrogen          | A-11058                 | 1:2000          | AB_2534105  |
| <b>Goat IgG (H+L)</b>   | Polyclonal / AlexaFluor® 488  | Invitrogen          | A-11055                 | 1:2000          | AB_2534102  |
| <b>Mouse IgG (H+L)</b>  | Polyclonal / AlexaFluor® 594  | Invitrogen          | A-11032                 | 1:2000          | AB_2534091  |
| <b>Mouse IgG (H+L)</b>  | Polyclonal / AlexaFluor® 488  | Invitrogen          | A-11059                 | 1:2000          | AB_2534106  |
| <b>Rabbit IgG (H+L)</b> | Polyclonal / AlexaFluor® 594  | Invitrogen          | A-11037                 | 1:2000          | AB_2534095  |
| <b>Rabbit IgG (H+L)</b> | Polyclonal / AlexaFluor® 488  | Invitrogen          | A-11008                 | 1:2000          | AB_143165   |
| <b>Rabbit IgG</b>       | -                             | Cell Signaling      | 8114S                   | -               | AB_10544930 |
| <b>Mouse IgG</b>        | -                             | Cell Signaling      | 8125S                   | -               | AB_10547893 |
| <b>Mouse IgG (H+L)</b>  | Polyclonal / Alexa-Fluor® 647 | Invitrogen          | A-31571                 | 1:250           | AB_162542   |

|                         |                               |            |          |       |            |
|-------------------------|-------------------------------|------------|----------|-------|------------|
| <b>Rat IgG (H+L)</b>    | Polyclonal / Alexa Fluor® 750 | Invitrogen | Ab175750 | 1:250 | -          |
| <b>Rabbit IgG (H+L)</b> | Polyclonal / Alexa-Fluor® 647 | Invitrogen | A-31573  | 1:250 | AB_2536183 |
| <b>Mouse IgG (H+L)</b>  | Polyclonal / Alexa-Fluor® 750 | Invitrogen | A-21037  | 1:250 | AB_2535708 |

**Table S8. RT-qPCR Primers used to detect human transcripts.**

| <b>Target</b>  | <b>Forward primer</b>    | <b>Reverse primer</b>    |
|----------------|--------------------------|--------------------------|
| <i>RPS14</i>   | CTGCGAGTGCTGTCAGAGG      | TCACCGCCCTACACATCAAACCT  |
| <i>CDKN1A</i>  | CGTGTCAGTGTCTTGTACCCT    | GCGTTTGGAGTGGTAGAAATCT   |
| <i>CDKN2A</i>  | CGGTCCGAGGCCGATCCAG      | GCGCCGTGGAGCAGCAGCAGCT   |
| <i>PLAUR</i>   | CCACTCAGAGAAGACCAACAGG   | GTAACGGCTTCGGGAATAGGTG   |
| <i>LMNB1</i>   | GAGAGCAACATGATGCCCAAGTG  | GTTCTTCCCTGGCACTGTTGAC   |
| <i>IL1A</i>    | AGTGCTGCTGAAGGAGATGCCTGA | CCCCTGCCAAGCACACCCAGTA   |
| <i>IL1B</i>    | TGCACGCTCCGGGACTCACA     | CATGGAGAACACCACTTGTGCTCC |
| <i>IL6</i>     | CCAGGAGCCCAGCTATGAAC     | CCCAGGGAGAAGGCAACTG      |
| <i>IL8</i>     | GAGTGGACCACACTGCGCCA     | TCCACAACCCTCTGCACCCAGT   |
| <i>CXCL10</i>  | GGTGAGAAGAGATGTCTGAATCC  | GTCCATCCTTGGAAGCACTGCA   |
| <i>TNFA</i>    | CTCTTCTGCCTGCTGCACTTTG   | ATGGGCTACAGGCTTGTCACTC   |
| <i>SMARCA4</i> | CAAAGACAAGCACATCCTCGCC   | GCCACATAGTGCCTGTTGAGCA   |
| <i>FURIN</i>   | GCCACATGACTACTCCGCAGAT   | TACGAGGGTGAACCTTGGTCAGC  |
| <i>POLR1B</i>  | CACAACCAGAGTCCACGGAACA   | TCACCAAGGGACTCTGAGGAGT   |
| <i>IFNG</i>    | GAGTGTGGAGACCATCAAGGAAG  | TGCTTTGCGTTGGACATTCAAGTC |
| <i>GZMA</i>    | CCACACGCGAAGGTGACCTTAA   | CCTGCAACTTGGCACATGGTTC   |
| <i>GZMB</i>    | CGACAGTACCATTGAGTTGTGCG  | TTCGTCCATAGGAGACAATGCC   |
| <i>PRF1</i>    | ACTCACAGGCAGCCAACCTTTGC  | CTCTTGAAGTCAGGGTGCAGCG   |
| <i>CGAS</i>    | AGGAAGCAACTACGACTAAAGCC  | CGATGTGAGAGAAGGATAGCCG   |
| <i>STING</i>   | CCTGAGTCTCAGAACAACCTGCC  | GGTCTTCAAGCTGCCACAGTA    |
| <i>MAVS</i>    | ATGGTGCTCACCAAGGTGTCTG   | TCTCAGAGCTGCTGTCTAGCCA   |
| <i>MDA5</i>    | GCTGAAGTAGGAGTCAAAGCCC   | CCACTGTGGTAGCGATAAGCAG   |
| <i>RIG-1</i>   | CACCTCAGTTGCTGATGAAGGC   | GTCAGAAGGAAGCACTTGCTACC  |
| <i>IRF3</i>    | TCTGCCCTCAACCGCAAAGAAG   | TACTGCCTCCACCATTGGTGTC   |
| <i>IRF7</i>    | CCACGCTATACCATCTACCTGG   | GCTGCTATCCAGGGAAGACACA   |
| <i>TBK1</i>    | CAACCTGGAAGCGGCAGAGTTA   | ACCTGGAGATAATCTGCTGTCTGA |

**Table S9. RT-qPCR Primers used to detect mouse transcripts.**

| <b>Target</b>     | <b>Forward primer</b>    | <b>Reverse primer</b>    |
|-------------------|--------------------------|--------------------------|
| <i>Rn18S</i>      | ACCGCAGCTAGGAATAATG      | GCCTCAGTTCCGAAAACCA      |
| <i>Gapdh</i>      | AACTTTGGCATTGTGGAAGG     | ACACATTGGGGGTAGGAACA     |
| <i>Il6</i>        | CCTGAGACTCAAGCAGAAATGG   | AGAAGGAAGGTCGGCTTCAGT    |
| <i>Mcp1/ Ccl2</i> | CATCCACGTGTTGGCTCA       | GATCATCTTGCTGGTGAATGAGT  |
| <i>Tnfa</i>       | GGTGCCTATGTCTCAGCCTCTT   | GCCATAGAACTGATGAGAGGGAG  |
| <i>Ccl5</i>       | CTGCTGCTTTGCCTACCTCT     | CGAGTGACAAACACGACTGC     |
| <i>Cxcl10</i>     | ATCATCCCTGCGAGCCTATCCT   | GACCTTTTTTGGCTAAACGCTTTC |
| <i>Cxcl1</i>      | CTGGGATTCACCTCAAGAACATC  | CAGGGTCAAGGCAAGCCTC      |
| <i>Il15</i>       | GTAGGTCTCCCTAAAACAGAGGC  | TCCAGGAGAAAGCAGTTCATTGC  |
| <i>Il18</i>       | GACAGCCTGTGTTTCGAGGATATG | TGTTCTTACAGGAGAGGGTAGAC  |
| <i>Raet1a</i>     | GACAGCAAATGCCACTGAAGTGG  | GCTTTGCAGATAAATCATGGTGAC |
| <i>Raet1b</i>     | CCAAAGTGGACACTCACAAGACC  | GAATTCCCAGGTGGCACTAGGA   |
| <i>Raet1c</i>     | GACGGCAAATGCCACTGAAGTG   | GCCCTGGCTTTGCGGATAAATC   |
| <i>Raet1d</i>     | CCAAAGTGGACACTCACAAGACC  | GTCATAATCTCTGTGTAGAAGGT  |
| <i>Raet1e</i>     | CCTCTGAACGATTTGTGCCAGG   | GCCCTGGCTTTGCGGATAAATC   |
| <i>Mult-1</i>     | GTGCAGGAGACTAACACAACCG   | TGCCAGTGCTTGTGTCAACACG   |
| <i>H60a</i>       | GGTCTGAGTGTCACCTGGATTG   | TTTTCTTCAGCATAACCAAGCGA  |
| <i>GranzymeA</i>  | TGCTGCCCCACTGTAACGTG     | GGTAGGTGAAGGATAGCCACAT   |
| <i>GranzymeB</i>  | CCACTCTCGACCCTACATGG     | GGCCCCCAAAGTGACATTTATT   |
| <i>Perforin</i>   | AGCACAAGTTCGTGCCAGG      | GCGTCTCTCATTAGGGAGTTTTT  |
| <i>Il33</i>       | ATGGGAAGAAGCTGATGGTG     | CCGAGGACTTTTTTGAAGG      |
| <i>Ifng</i>       | ATGAACGCTACACACTGCATC    | CCATCCTTTTGCCAGTTCCTC    |



**Table S10. siRNA sequences.**

| <b>Target</b>        | <b>siRNA_ID</b> | <b>Sequence</b>     | <b>Cat. number</b> |
|----------------------|-----------------|---------------------|--------------------|
| <b>Non targeting</b> | 2               | UAAGGCUAUGAAGAGAUAC | D-001210-02        |
| <b>Non targeting</b> | 4               | AUGAACGUGAAUUGCUCAA | D-001210-04        |
| <b>L3HYPDH</b>       | 3               | GAAGAUGACGACCCAUUGA | D-010373-03        |
| <b>EPRS</b>          | 3               | GAAGAGGGAUGACAGUUGA | D-008245-03        |
| <b>SIRT1</b>         | 3               | GCGAUUGGGUACCGAGAU  | D-003540-07        |
| <b>LG MN</b>         | 2               | GAACAGAUCGUUGUGAUGA | D-005924-02        |
| <b>LPAR2</b>         | 1               | UCUACUACCUGCUCGGCAA | D-004602-21        |
| <b>FOSL1</b>         | 1               | GCUCAUCGCAAGAGUAGCA | D-004341-23        |
|                      | 2               | GGACACAGGCAGUACCAGU | D-004341-24        |
|                      | 3               | AGCGAGAGAUUGAGGAGCU | D-004341-25        |
|                      | 4               | GCAGGCGGAGACUGACAAA | D-004341-26        |
| <b>KDM5C</b>         | 1               | GAGCGGAGGUUCCUAAUA  | D-010097-01        |
|                      | 2               | GUGGACAACUUCAGGUUUA | D-010097-02        |
|                      | 3               | GCAAGGAUAUGCCUAAGGU | D-010097-03        |
|                      | 4               | GAGUGAAACUGAACUACUU | D-010097-04        |
| <b>MMP8</b>          | 1               | GCACUAAUGUGAUCGUUGA | D-005969-01        |
|                      | 2               | CCAAGGAUAUAUCAAACUA | D-005969-02        |
|                      | 3               | GAGAAGGCAUCCUCAGCUA | D-005969-03        |
|                      | 4               | AGAAAGAGCUAUCAAGGAU | D-005969-04        |
| <b>PHF19</b>         | 1               | CCUCGUGACUUUCGAAGAU | D-026200-03        |
|                      | 2               | GGAAGUGUGGCCUGGGUUA | D-026200-20        |
|                      | 3               | GGUCAGCAGCUCUAAGCAA | D-026200-21        |
|                      | 4               | GAUCCAGGGACUCGGGACU | D-026200-22        |
| <b>POLR1B</b>        | 1               | UCAUAGGAGUGGUUUUUUA | D-013391-02        |
|                      | 2               | GAACCCAACUAUCGGAGAU | D-013391-03        |
|                      | 3               | ACCAAUGCCAGAUGGGUAA | D-013391-17        |
|                      | 4               | CCUUAACUACCUAGGUGAA | D-013391-18        |

|                |   |                     |             |
|----------------|---|---------------------|-------------|
| <b>SMARCA4</b> | 1 | GAAAGGAGCUGCCCGAGUA | D-010431-01 |
|                | 2 | CCAAGGAUUUCAAGGAAUA | D-010431-02 |
|                | 3 | GAAAGUGGCUCAGAAGAAG | D-010431-03 |
|                | 4 | AGACAGCCCUCAAUGCUAA | D-010431-04 |
| <b>CD247</b>   | 1 | GGAAUCCUCUUCAUCUAUG | D-004257-01 |
|                | 2 | GAAGAGAGGAGUACGAUGU | D-004257-02 |
|                | 3 | ACAGUGAGAUUGGGAUGAA | D-004257-04 |
|                | 4 | AGGAAGGCCUGUACAAUGA | D-004257-05 |
| <b>DPH5</b>    | 1 | GGAAUCCUUAUAGAGUUA  | D-020926-01 |
|                | 2 | GUAUAUGAGUGUAAACCAA | D-020926-02 |
|                | 3 | ACAGUGAUCUUGUUCUAAG | D-020926-03 |
|                | 4 | ACGCUGCAGUCGAGUGUAU | D-020926-04 |
| <b>FCRL2</b>   | 1 | CCUGAUGGCUAUAGAAGAG | D-016490-01 |
|                | 2 | CCUCAUGACAGCUGGAGUU | D-016490-02 |
|                | 3 | CCCAAUCUUGUACCAAUUU | D-016490-03 |
|                | 4 | GUCCUUGGUUUCACUGGUG | D-016490-04 |
| <b>FOXH1</b>   | 1 | CCACGAGAGUGGAGGGGGA | D-008636-01 |
|                | 2 | AGAAGAGGUACCUGCGACA | D-008636-02 |
|                | 3 | GGAAAGACUCCAUUCGCCA | D-008636-03 |
|                | 4 | CCAAUGUGGUAAUGCCCUU | D-008636-04 |
| <b>FURIN</b>   | 1 | GGACUAAACGGGACGUGUA | D-005882-01 |
|                | 2 | GGACUUGGCAGGCAAUUAU | D-005882-02 |
|                | 3 | GCAGAUGGGUUUAAUGACU | D-005882-03 |
|                | 4 | GGGCUGGGCUCCAUCUUUG | D-005882-04 |
| <b>GLRA4</b>   | 1 | UGAAAGACCUCGUGUUUGA | D-034258-05 |
|                | 2 | GCGAACAUCUGGAUAUGAU | D-034258-06 |
|                | 3 | GACCACGGACAACAAGUUA | D-034258-07 |
|                | 4 | CGCCUGUCCUACCGAGAAU | D-034258-09 |
| <b>ARID1A</b>  | 1 | GCAACGACAUGAUUCCUAU | D-017263-01 |
|                | 2 | GAAUAGGGCCUGAGGGAAA | D-017263-02 |

|               |   |                      |             |
|---------------|---|----------------------|-------------|
|               | 3 | AGAUGUGGGUGGACCGUUA  | D-017263-03 |
|               | 4 | UAGUAUGGCUGGCAUGAUC  | D-017263-04 |
| <b>ARID1B</b> | 1 | CCACAGCGGUUAUCCAAUUG | D-013970-01 |
|               | 2 | GUAUGGACCUCAACAGACA  | D-013970-02 |
|               | 3 | GGCGAAAGAUUACCUCCAA  | D-013970-03 |
|               | 4 | GGCGUGAGCUGGCAACCAA  | D-013970-04 |
| <b>ARID1A</b> | 1 | GGUCGCAGAUUGUUAAGA   | D-026945-01 |
|               | 2 | CGACAGCGGUUUUCUUUUA  | D-026945-02 |
|               | 3 | CCAAUAAAGUAGGAGUUA   | D-026945-03 |
|               | 4 | GCAAUUAGGCCUUGACACA  | D-026945-04 |
| <b>ARID1B</b> | 1 | GGACAUGCAUGACGAUAAC  | D-013141-01 |
|               | 2 | GCCCAAGGUUGAUGACAAA  | D-013141-02 |
|               | 3 | ACACAUCCCUACGAAUCUA  | D-013141-03 |
|               | 4 | GGACGAGAAGUGUGGCUCA  | D-013141-04 |
| <b>ARID2</b>  | 1 | GUACUAAUGCCAUGAUUUA  | D-020297-01 |
|               | 2 | GCAAGUAACUCCAGGUGAU  | D-020297-02 |
|               | 3 | GCACGU AUGGAGUUCGAAA | D-020297-04 |
|               | 4 | GAACAGUCAGUGCGAAUUU  | D-020297-17 |
| <b>BCL7A</b>  | 1 | CAAUGAAGAUACAGCUGUU  | D-014250-01 |
|               | 2 | GGCCAGAUACCGUGUACUA  | D-014250-02 |
|               | 3 | CACGCAGGCUUUAAGAUGA  | D-014250-03 |
|               | 4 | AGUCAGUUACGGAAUUUAA  | D-014250-04 |
| <b>BRD7</b>   | 1 | CGGGACAGAUUUACACGUA  | D-031779-01 |
|               | 2 | CAUUAUGGACUGUCAGAAA  | D-031779-03 |
|               | 3 | GGCCAAAGGAAAGGCAUUA  | D-031779-04 |
|               | 4 | GCGAGGACUUCUACCGCGA  | D-031779-17 |
| <b>BRD9</b>   | 1 | GUGGACAGCUCAUCGCGAA  | D-020751-02 |
|               | 2 | GUAAUGAUCGACCGAAUGU  | D-020751-03 |
|               | 3 | GCAUCGGGCUCAAGCUCAA  | D-020751-04 |
|               | 4 | GAUGCUUACUAGACGUGAU  | D-020751-17 |

|                |   |                      |             |
|----------------|---|----------------------|-------------|
| <b>DPF1</b>    | 1 | GAAAUCAACCAGACUAUUA  | D-008692-01 |
|                | 2 | GAAAUUGAGUUUGUUCAGAA | D-008692-02 |
|                | 3 | GAAACUGCCUUCUAAAGUG  | D-008692-03 |
|                | 4 | UGACAUGGCUUCUCCCAA   | D-008692-04 |
| <b>GLTSCR1</b> | 1 | GCACUUCGGUUACUCAAUU  | D-017253-01 |
|                | 2 | CCGCAUAGCUCAUAGGAUA  | D-017253-02 |
|                | 3 | GAAGGGCACUGGUAUGCGA  | D-017253-03 |
|                | 4 | CAAAGCAACCGUGGAACUA  | D-017253-04 |
| <b>PBRM1</b>   | 1 | GAAAGGAGCUGCCCGAGUA  | D-010431-01 |
|                | 2 | CCAAGGAUUUCAAGGAAUA  | D-010431-02 |
|                | 3 | GAAAGUGGCUCAGAAGAAG  | D-010431-03 |
|                | 4 | AGACAGCCCUCAAUGCUAA  | D-010431-04 |
| <b>SMARCA2</b> | 1 | GAAACUACCUCGUAUGUU   | D-010536-01 |
|                | 2 | CCACAACCAUCAACAGGAA  | D-010536-02 |
|                | 3 | GUGACGAUCUGGAUUUGAA  | D-010536-03 |
|                | 4 | AGACCUACGCCUUCAGCGA  | D-010536-17 |
| <b>SMARCB1</b> | 1 | GAAGUUGGCUAACAAAUUG  | D-010813-01 |
|                | 2 | GAACUUGACUGGAGAUGUG  | D-010813-02 |
|                | 3 | GAAGUAUGCUGAAUUACGA  | D-010813-03 |
|                | 4 | GAGCAGACCAAUCACAUUA  | D-010813-04 |
| <b>SMARCC1</b> | 1 | GAUCAAAUGUUCCUAGAU   | D-008312-01 |
|                | 2 | CCAAGACACUGACAGAUGA  | D-008312-02 |
|                | 3 | GCUACUAUCCUGACAGUUA  | D-008312-03 |
|                | 4 | GAUCAAAACUUCGGCACUUU | D-008312-04 |
| <b>SMARCC2</b> | 1 | UCAGUGCUCUGGACAGUAA  | D-009459-01 |
|                | 2 | UAAACCAGCUCAAGAUGCA  | D-009459-02 |
|                | 3 | UGACAAGGAAUACAUCAAU  | D-009459-03 |
|                | 4 | GAAGAAGACGGCGUGCUAU  | D-009459-05 |
| <b>SMARCD3</b> | 1 | GCAACGACAUGAUUCCUUAU | D-017263-01 |
|                | 2 | GAAUAGGGCCUGAGGGAAA  | D-017263-02 |

|                                  |   |                      |             |
|----------------------------------|---|----------------------|-------------|
|                                  | 3 | AGAUGUGGGUGGACCGUUA  | D-017263-03 |
|                                  | 4 | UAGUAUGGCUGGCAUGAUC  | D-017263-04 |
| <b>cGAS</b><br><b>(MB21D1)</b>   | 1 | GAAGAAACAUGGCGGCUAU  | D-015607-01 |
|                                  | 2 | GAAGAGAAAUGUUGCAGGA  | D-015607-02 |
|                                  | 3 | GUAAGGAAUUUCUGACAAA  | D-015607-03 |
|                                  | 4 | CAACACUCGUGCAUAUUAC  | D-015607-04 |
| <b>STING</b><br><b>(TMEM173)</b> | 1 | GCACCUGUGUCCUGGAGUA  | D-024333-01 |
|                                  | 2 | GGUCAUAUUACAUCGGAUA  | D-024333-02 |
|                                  | 3 | GCAUCAAGGAUCGGGUUUA  | D-024333-03 |
|                                  | 4 | ACAUUCGCUUCCUGGAUAA  | D-024333-04 |
| <b>MAVS</b>                      | 1 | AAGUAUAUCUGCCGCAAUU  | D-024237-02 |
|                                  | 2 | GCUGUGAGCUAGUUGAUCU  | D-024237-04 |
|                                  | 3 | CAAGAGACCAGGAUCGACU  | D-024237-19 |
|                                  | 4 | AGAAUGAGUAUAAGUCCGA  | D-024237-20 |
| <b>MDA5 (IFIH1)</b>              | 1 | GAGAAUAACUCAUCAGAAU  | D-013041-01 |
|                                  | 2 | GAAAUCAUCUGCAAUGUG   | D-013041-02 |
|                                  | 3 | GGAAAUGAAUCAGGUGUAA  | D-013041-03 |
|                                  | 4 | GAAUAACCCAUCACUAAUA  | D-013041-04 |
| <b>RIG-1</b><br><b>(DDX58)</b>   | 1 | CAGAAGAUUCUUGAGGAUAA | D-012511-01 |
|                                  | 2 | GCACAGAAGUGUAUAUUGG  | D-012511-02 |
|                                  | 3 | AGACAUGGGUAUAGAGUUA  | D-012511-03 |
|                                  | 4 | CAACCGAUUAUCAUUUCUGA | D-012511-04 |
| <b>IRF3</b>                      | 1 | GCAAAGAAGGGUUGCGUUU  | D-006875-01 |
|                                  | 2 | AUGCACAGCAGGAGGAUUU  | D-006875-03 |
|                                  | 3 | GGGAAGAGUGGGAGUUCGA  | D-006875-04 |
|                                  | 4 | CCAAGAGGCUCGUGAUGGU  | D-006875-05 |
| <b>IRF7</b>                      | 1 | GGAAGCACUUCGCGCGCAA  | D-011810-03 |
|                                  | 2 | GAGAGUGGCUCCUUGGAGA  | D-011810-04 |
|                                  | 3 | GACAUCGAGUGCUUCCUUA  | D-011810-05 |
|                                  | 4 | CGAGCUGCACGUUCCUAUA  | D-011810-06 |

|                    |   |                     |             |
|--------------------|---|---------------------|-------------|
| <b><i>TBK1</i></b> | 1 | GAACGUAGAUUAGCUUAUA | D-003788-01 |
|                    | 2 | UGACAGAGAUUUACUAUCA | D-003788-02 |
|                    | 3 | UAAAGUACAUCCACGUUAU | D-003788-06 |
|                    | 4 | GGAUAUCGACAGCAGAUUA | D-003788-07 |
| <b><i>RELA</i></b> | 1 | GGAUUGAGGAGAAACGUAA | D-003533-03 |

**Table S11. Source data for the Figures and Supplementary Figures.** It is included as an Excel file.
